# Supplementary material for: Stereochemical Behavior of Pyrrolo-Pyrazole Peptidomimetics Promoting Phase-Selective Supramolecular Organogels
Source: MDPI journal article supplement (doi:10.3390/gels10040263), 2024-04-14

# Stereochemical Behavior of Pyrrolo-pyrazole Peptidomimetics Promoting Phase-Selective Supramolecular Organogels

Enrica Chiesa <sup>1</sup>, Francesco Anastasi <sup>2</sup>, Francesca Clerici <sup>2</sup>, Edoardo Mario Lumina <sup>2</sup>, Ida Genta <sup>1</sup>, Sara Pellegrino <sup>2,\*</sup> and Maria Luisa Gelmi <sup>2,\*</sup>

|                                                  |                |
|--------------------------------------------------|----------------|
| <b>1. GELATION STUDIES</b>                       | <b>S2-S3</b>   |
| <b>2. NMR STUDIES ON 5b AND 5'b</b>              | <b>S4-S15</b>  |
| <b>3. NMR SPECTRA OF COMPOUNDS 3, 4 AND 5/5'</b> | <b>S16-S38</b> |

## 1. GELATION STUDIES

**Table TS1.** Gelation test on compound **4a-d** (2%) at 25 °C (overnight) in different solvents.

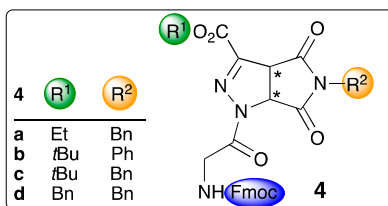

| Compound  | Hexane/AcOEt (6:4) | <i>t</i> -BuOMe | Toluene/Dioxane (10:1) | Toluene |
|-----------|--------------------|-----------------|------------------------|---------|
| <b>4a</b> | S                  | G with P        | S                      | S       |
| <b>4b</b> | S                  | S               | S                      | S       |
| <b>4c</b> | S/P                | S/P             | S/P                    | S       |
| <b>4d</b> | S                  | I               | S                      | S       |

G: gel, S: (viscous) solution, P: precipitate; I: insoluble

**Table TS2.** Gelation test on compound **5a,c,d** and **5'a,c,d** (2%) at 25 °C (overnight) in different solvents.

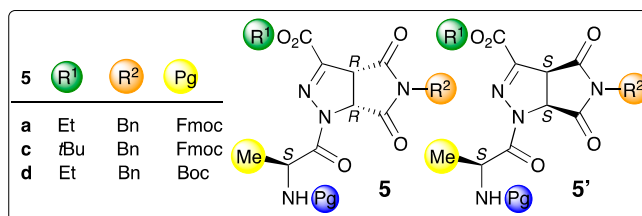

| Compound   | Hexane/AcOEt (6:4) | <i>t</i> -BuOMe | Toluene/Dioxane (10:1) | Toluene |
|------------|--------------------|-----------------|------------------------|---------|
| <b>5a</b>  | S/P                | S/P             | S/P                    | S/P     |
| <b>5'a</b> | S/P                | S/P             | S/P                    | S/P     |
| <b>5c</b>  | S/P                | S/P             | S/P                    | S/P     |
| <b>5'c</b> | S                  | I               | S                      | S       |
| <b>5d</b>  | S/P                | S/P             | S                      | S/P     |
| <b>5'd</b> | S/P                | S/P             | S/P                    | S/P     |

S: (viscous) solution, P: precipitate; I: insoluble

**Table TS3.** Gelation test on compound **5b** at 25 °C (overnight) in different solvents and concentrations.

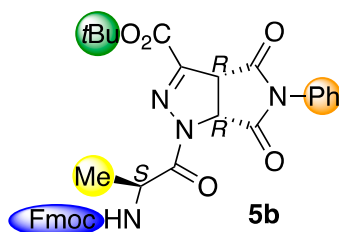

| Solvent (T)                     | % (w/v) | Status | % (w/v) | Status | % (w/v) | Status |
|---------------------------------|---------|--------|---------|--------|---------|--------|
| Hexane                          | 2       | PS     |         |        |         |        |
| C <sub>6</sub> H <sub>12</sub>  | 2       | I      |         |        |         |        |
| Hexane/AcOEt (6:4)              | 2       | G      | 2.5     | PS     | 3       | PS     |
| Et <sub>2</sub> O               | 1       | G      | 2       | G/PS   | -       | -      |
| <i>t</i> -BuOMe                 | 1       | G      | 2       | G      | -       | -      |
| AcOEt                           | 2       | S      | -       | -      | -       | -      |
| THF                             | 2       | I      | -       | -      | -       | -      |
| CH <sub>2</sub> Cl <sub>2</sub> | 2       | S      | -       | -      | -       | -      |
| CHCl <sub>3</sub>               | 2       | S      | -       | -      | -       | -      |
| AcOEt                           | 2       | S/P    | -       | -      | -       | -      |
| MeOH                            | 2       | I      | -       | -      | -       | -      |
| Tetraline                       | 2       | P      | 2.5     | P      | 3       | PS     |

|                        |      |    |      |    |     |   |
|------------------------|------|----|------|----|-----|---|
| Toluene                | 2    | S  | -    | -  | -   | - |
| Toluene/Dioxane (9:1)  | 1    | G  | 2    | G  | 2.5 | P |
| Toluene/Dioxane (10:1) | 1    | S  | 2    | G  | -   | - |
| Benzene                | 1.75 | PS | 1.9  | PS | 2   | G |
| <i>m</i> -Xylene       | 1.5  | S  | 1.75 | S  | 2   | G |
| Chloro-benzene         | 2    | P  | 2.5  | P  | 3   | P |

G: gel, S: (viscous) solution, PS partially soluble, P: precipitate; I: insoluble

**Table TS4.** Gelation test on compound **5'b** (2%) at 25 °C (overnight) in different solvents.

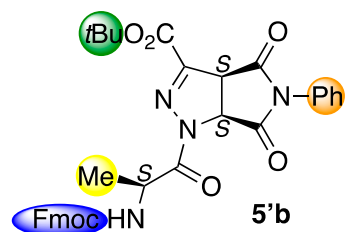

| Solvent                         | Status |
|---------------------------------|--------|
| Hexane                          | I      |
| Hexane/Acetate (6:4)            | S      |
| Diethyl ether                   | S      |
| CH <sub>2</sub> Cl <sub>2</sub> | S      |
| AcOEt                           | S      |
| MeOH                            | S      |
| Toluene                         | S      |
| Toluene/Dioxane (10:1)          | S      |
| <i>t</i> -BuOMe                 | S      |
| THF                             | S      |

S: (viscous) solution, I: insoluble

## 2. NMR STUDIES ON 5b AND 5'b

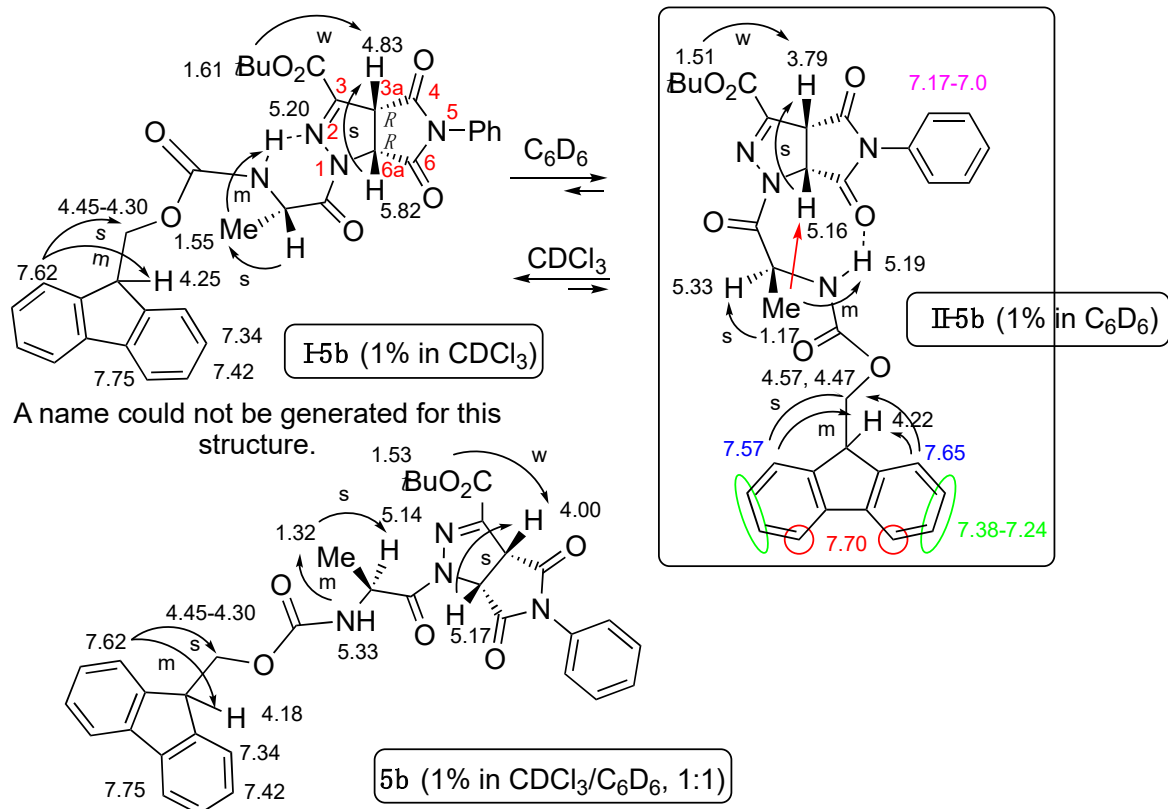

**Figure S1.** Chemical shifts, NOEs (arrow) and H-bond (dash) for **5b** (400 MHz; 298 K) in different solvents.

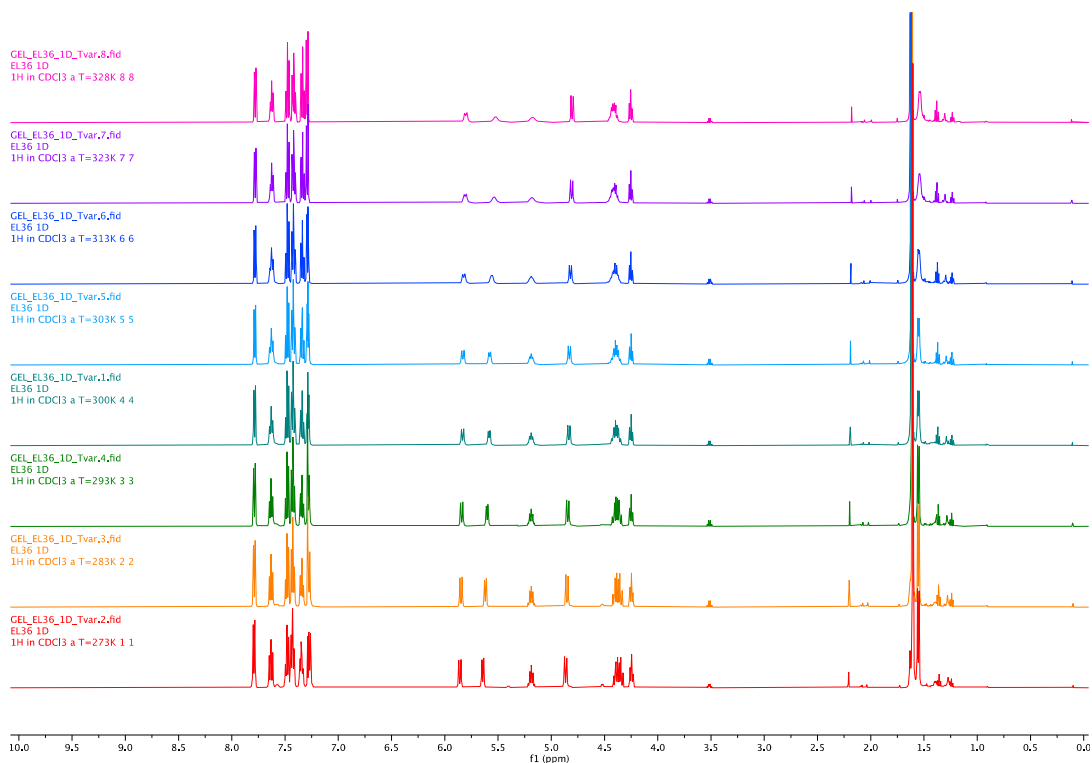

**Figure S2.**  $^1\text{H}$  NMR of compound **5b** in  $\text{CDCl}_3$  (1%, 400 MHz) at variable temperature (273-328 K)

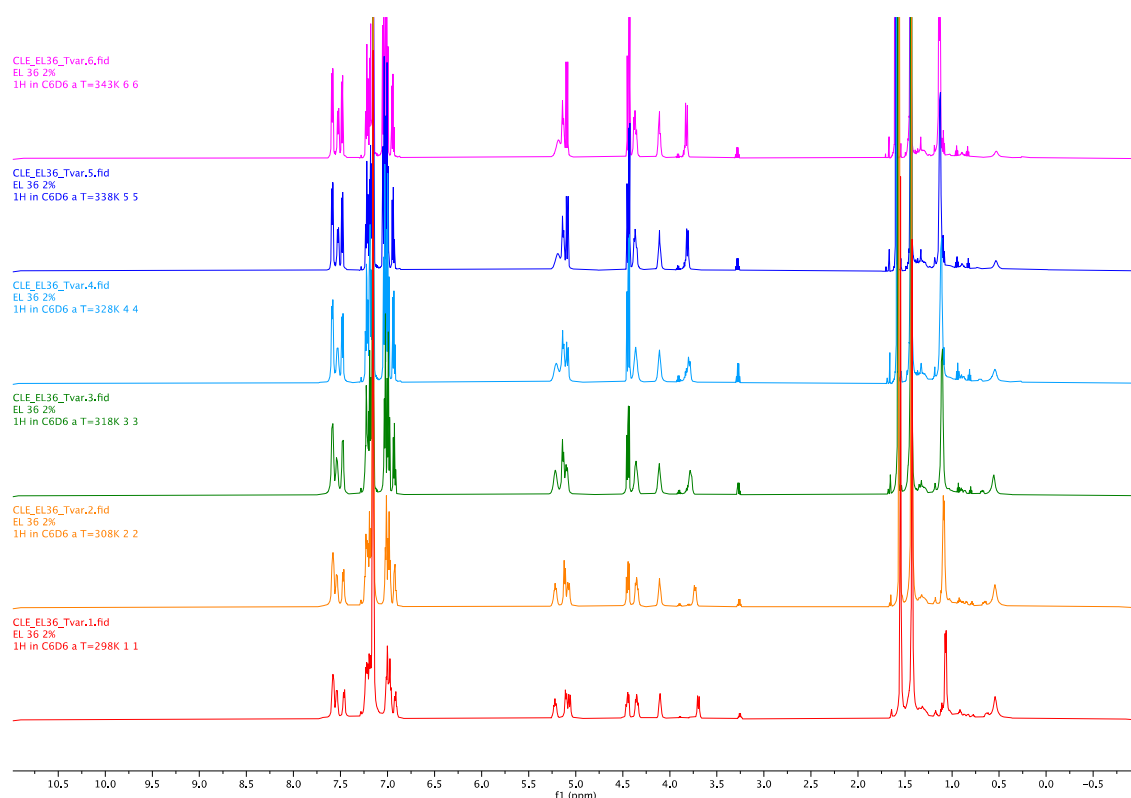

**Figure S3.**  $^1\text{H}$  NMR of a freshly prepared sample of **5b** in  $\text{C}_6\text{D}_6$  (2%, 400 MHz) at variable temperature (298-343K)

**Table TS5.** Chemical shifts of a sample of **5b** prepared the day before in  $\text{C}_6\text{D}_6$  (2%, 500 MHz) at variable temperature: from 298 to 348 and from 348 to 283

| T   | $\text{H}_{3a}$                     | $\text{H}_{6a}$        | $\text{NH}_{Ala}$    | $\text{CH}_{Ala}$ | $\text{Me}_{Ala}$    | $\text{CH}_{Fmoc}$ | $\text{CH}_2\text{Fmoc}$  | <i>t</i> Bu | Aromatic protons                                                                                                         |
|-----|-------------------------------------|------------------------|----------------------|-------------------|----------------------|--------------------|---------------------------|-------------|--------------------------------------------------------------------------------------------------------------------------|
| 298 | 3.73<br><i>J</i> 10.4               | 5.085<br><i>J</i> 10.4 | 5.1<br>Overl.        | 5.21              | 1.07<br><i>J</i> 6.6 | 4.09<br>(br t)     | 4.45 (dd)<br>4.35 (dd)    | 1.42        | Fmoc: 7.57 (br t, 2H), 7.53 (d, 1H), 7.476 (d, 1H), 7.25-7.15 (4H); Ph: 7.02-6.97 (2H), 6.98-6.94 (2H), 6.92-6.88 (1H)   |
| 333 | 3.81<br><i>J</i> 10.4               | 5.09<br><i>J</i> 10.2  | 5.13<br><i>J</i> 7.7 | 5.19              | 1.11<br>(br d)       | 4.10<br>(br)       | 4.44 (dd)<br>4.36 (br t)  | 1.43        | Fmoc: 7.58 (br d, 2H), 7.52 (d, 1H), 7.48 (d, 1H), 7.24-7.15 (4H); Ph: 7.06-7.01b(2H), 7.01-6.97 (2H), 6.95-6.92 (1H)    |
| 343 | 3.86                                | 5.09<br><i>J</i> 10.   | 5.14<br><i>J</i> 7.1 | 5.18              | 1.13<br><i>J</i> 6.5 | 4.10<br>(t)        | 4.43 (dd)<br>4.36 (br dd) | 1.44        | Fmoc: 7.58 (br d, 2H), 7.52 (d, 1H), 7.48 (d, 1H), 7.24-7.15 (4H); Ph: 7.06-7.02 (2H), 7.01-6.97 (2H), 6.96-6.91 (1H)    |
| 348 | 3.87<br><i>J</i> 10.4               | —5.20-5.10—            |                      |                   | 1.14<br><i>J</i> 6.3 | 4.10<br>(t)        | 4.43 (dd)<br>4.36 (br dd) | 1.44        | Fmoc: 7.57 (br d, 2H), 7.55 (d, 1H), 7.47 (d, 1H), 7.23-7.15 (4H); Ph: 7.03-6.98 (2H), 6.98-6.93(2H), 6.92-6.87 (1H)     |
| 333 | 3.85<br><i>J</i> 10.8               | 5.12<br><i>J</i> 10.4  | 5.14<br><i>J</i> 8.1 | 5.19<br>brs       | 1.12<br><i>J</i> 6.3 | 4.10<br>(brs)      | 4.43 (dd)<br>4.36 (brs)   | 1.43        | Fmoc: 7.58 (br d, 2H), 7.52 (d, 1H), 7.48 (d, 1H), 7.23-7.15 (4H); Ph: 7.06-7.02(2H), 7.02-6.98 (2H), 6.95-6.91 (1H)     |
| 293 | 3.86<br><i>J</i> 10.5               | 5.20<br><i>J</i> 10.7  | 5.16<br><i>J</i> 8.3 | 5.21<br>Overl.    | 1.08<br><i>J</i> 6.7 | 4.09<br>(t)        | 4.44 (dd)<br>4.36 (dd)    | 1.42        | Fmoc: 7.57 (br t, 2H), 7.55 (d, 1H), 7.47 (d, 1H), 7.25-7.15 (4H); Ph: 7.03-6.99 (2H), 6.99-6.94 (2H), 6.92-6.88 (1H)    |
| 283 | 3.89<br>(two<br>d <i>J</i><br>10.3) | 5.24<br><i>J</i> 10.7  | 5.18<br><i>J</i> 7.5 | 5.23              | 1.07<br><i>J</i> 5.6 | 4.09<br>(brs)      | 4.44 (t)<br>4.37 (t)      | 1.42        | Fmoc: 7.57 (br t, 2H), 7.65 (d, 1H), 7.47 (d, 1H), 7.26,7.16 (m, 4H); Ph: 7.04-6.99 (2H), 6.99-6.94 (2H), 6.92-6.87 (1H) |

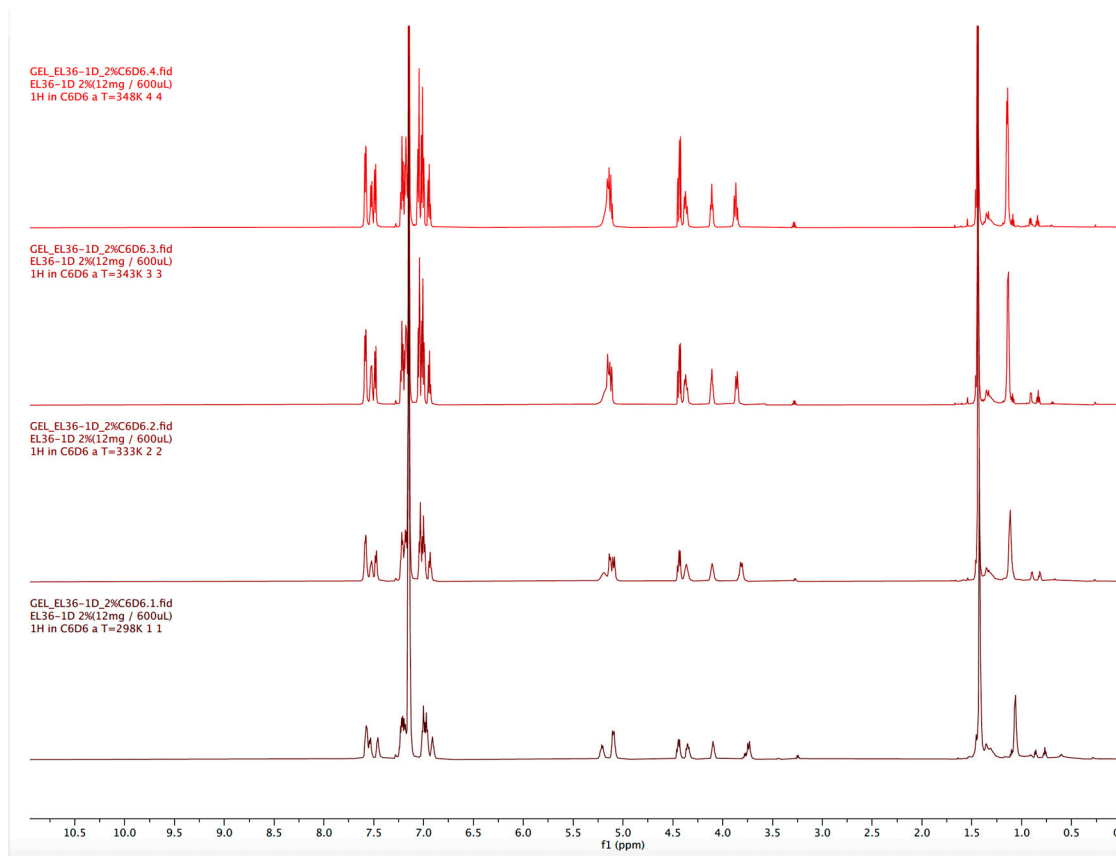

**Figure S4.**  $^1\text{H}$  NMR of a sample of **5b** prepared the day before in  $\text{C}_6\text{D}_6$  (2%, 500 MHz) at variable temperature (298-343K)

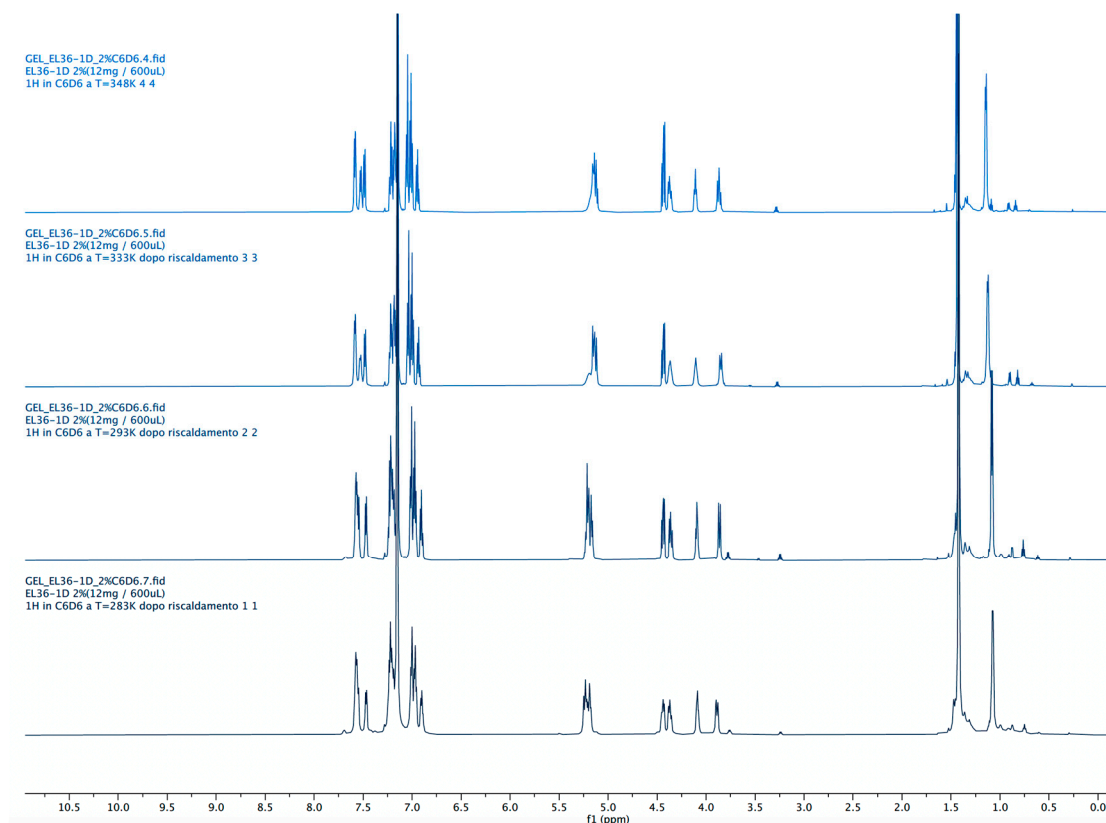

**Figure S5.**  $^1\text{H}$  NMR of a sample of **5b** prepared the day before in  $\text{C}_6\text{D}_6$  (2%, 500 MHz), heated (as reported in the legend of FS4), then cooled from 343 to 283 K.

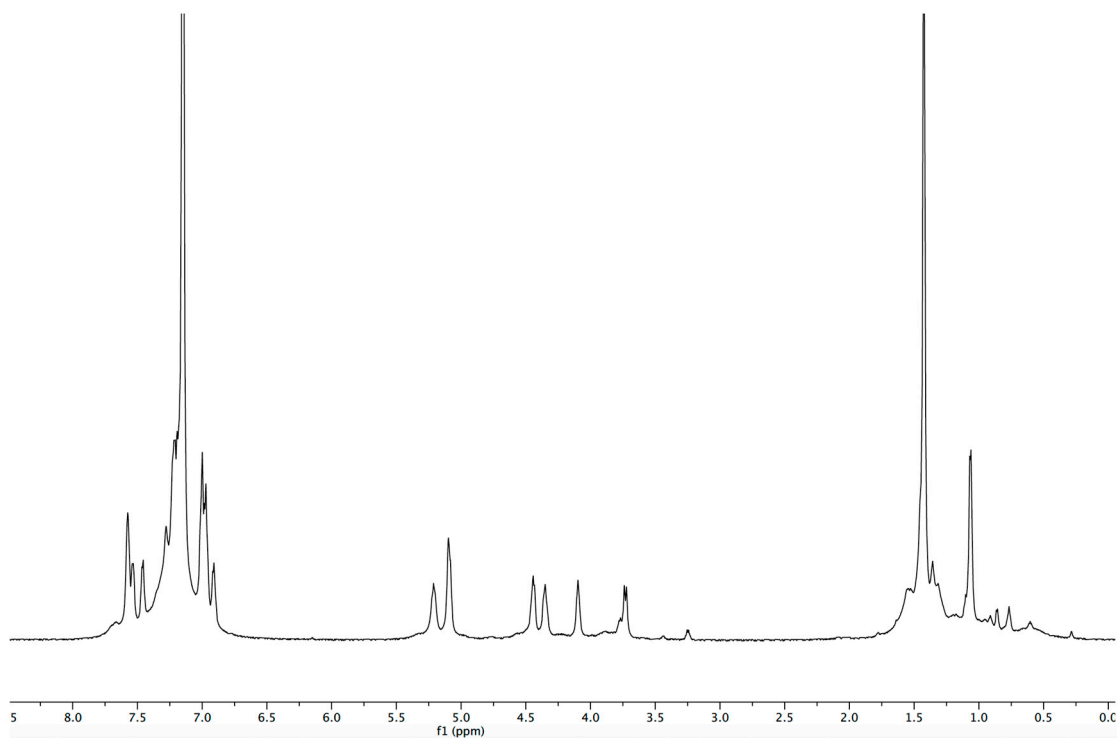

**Figure S6.**  $^1\text{H}$  NMR of a sample of **5b** prepared for experiments as reported in the legends of FS4 and FS5, then let it at 298 for 24 h.

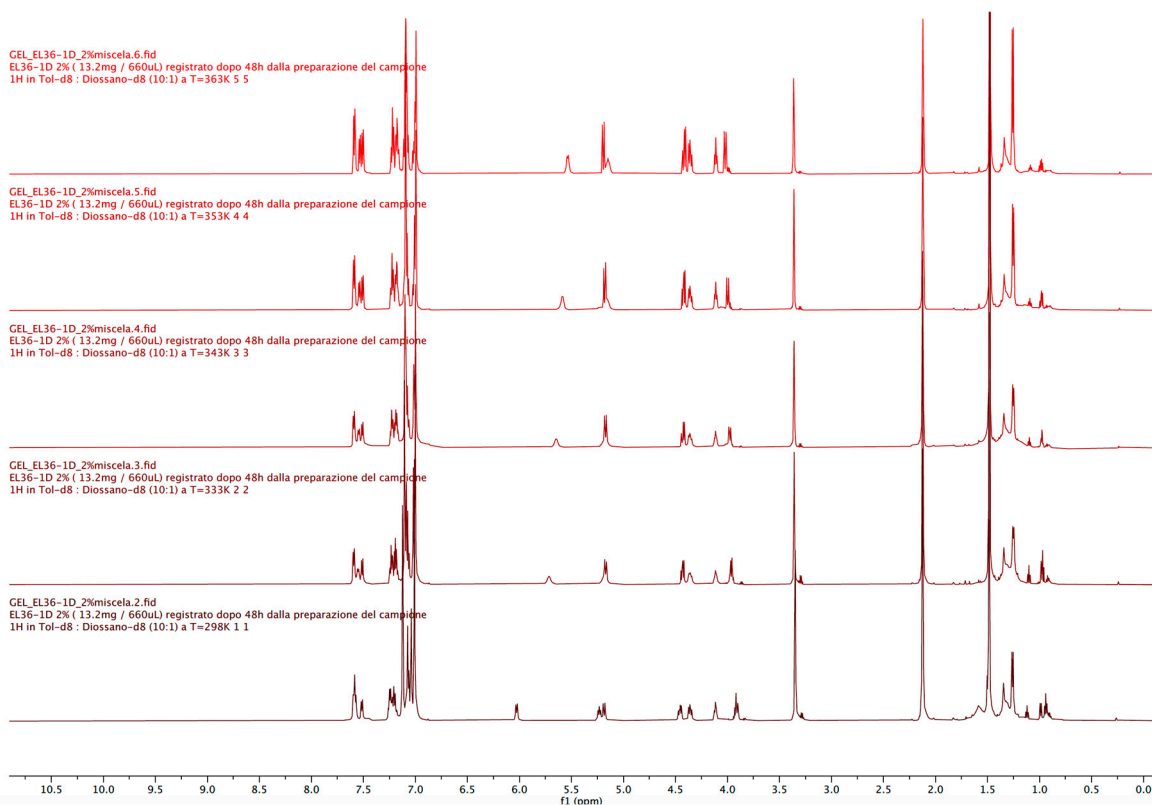

**Figure S7.**  $^1\text{H}$  NMR spectra at variable temperature (298-363K) of a sample of **5b** in toluene- $\text{d}_8$ /diossane- $\text{d}_8$  (10:1; 2%, 500 MHz), recorded after 48 h after the sample preparation.

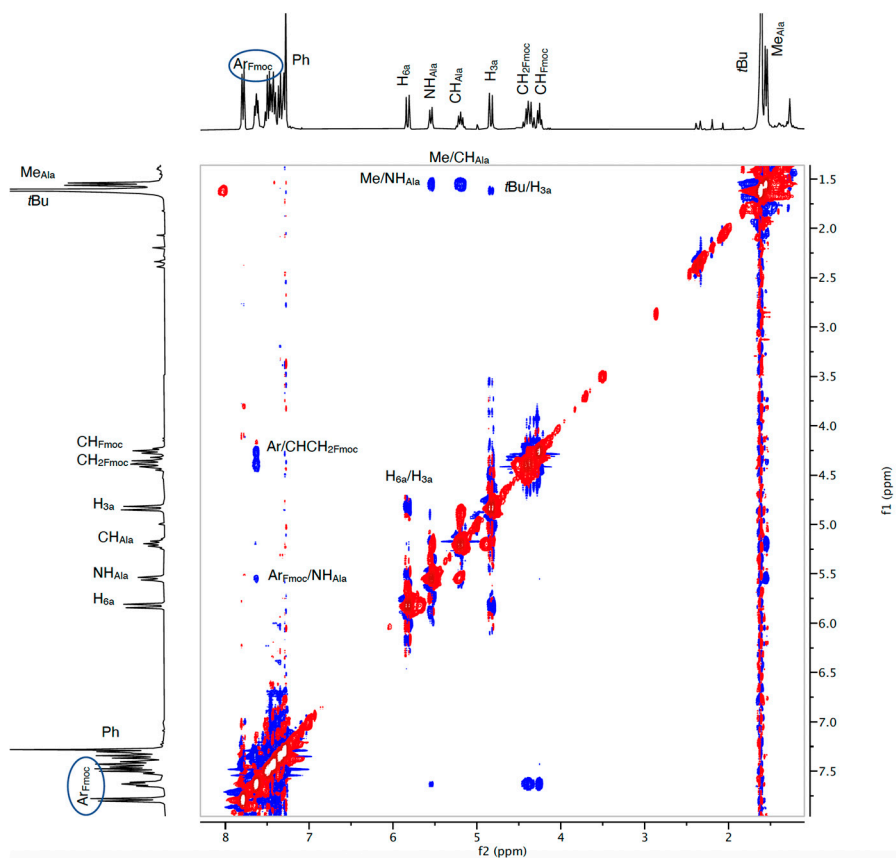

**Figure S8.** Noesy of compound **5b** (1%  $\text{CDCl}_3$ , 293 K, 400 MHz, 600 ms)

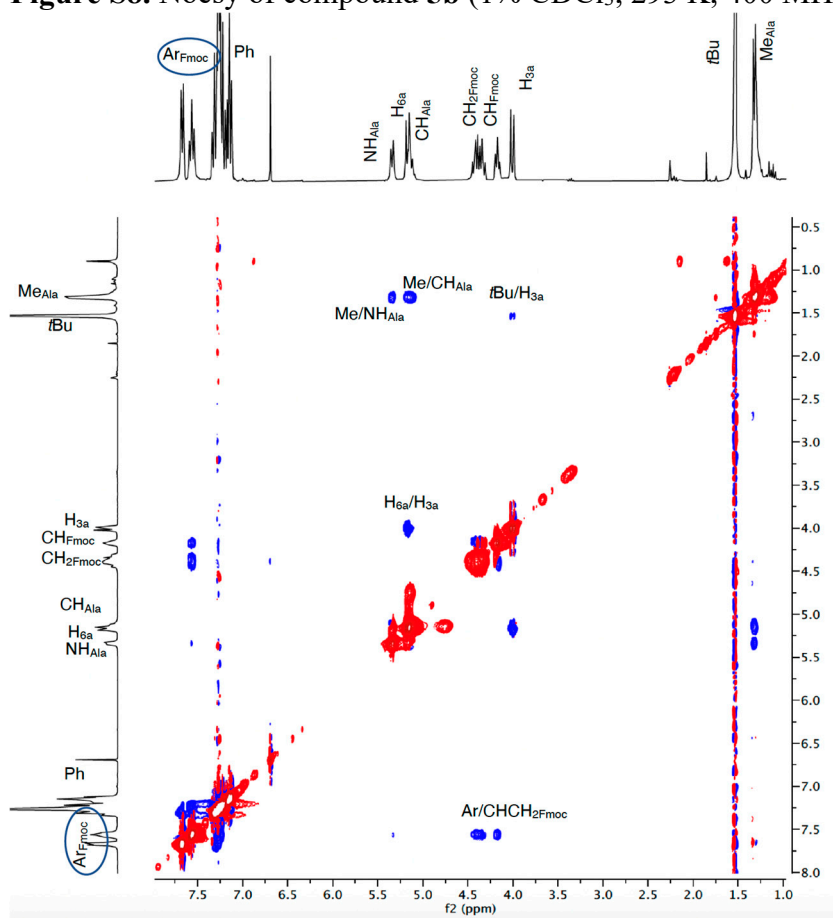

**Figure S9.** Noesy of compound **5b** (1%  $\text{CDCl}_3/\text{C}_6\text{D}_6$ , 1:1; 400 MHz) 600 ms

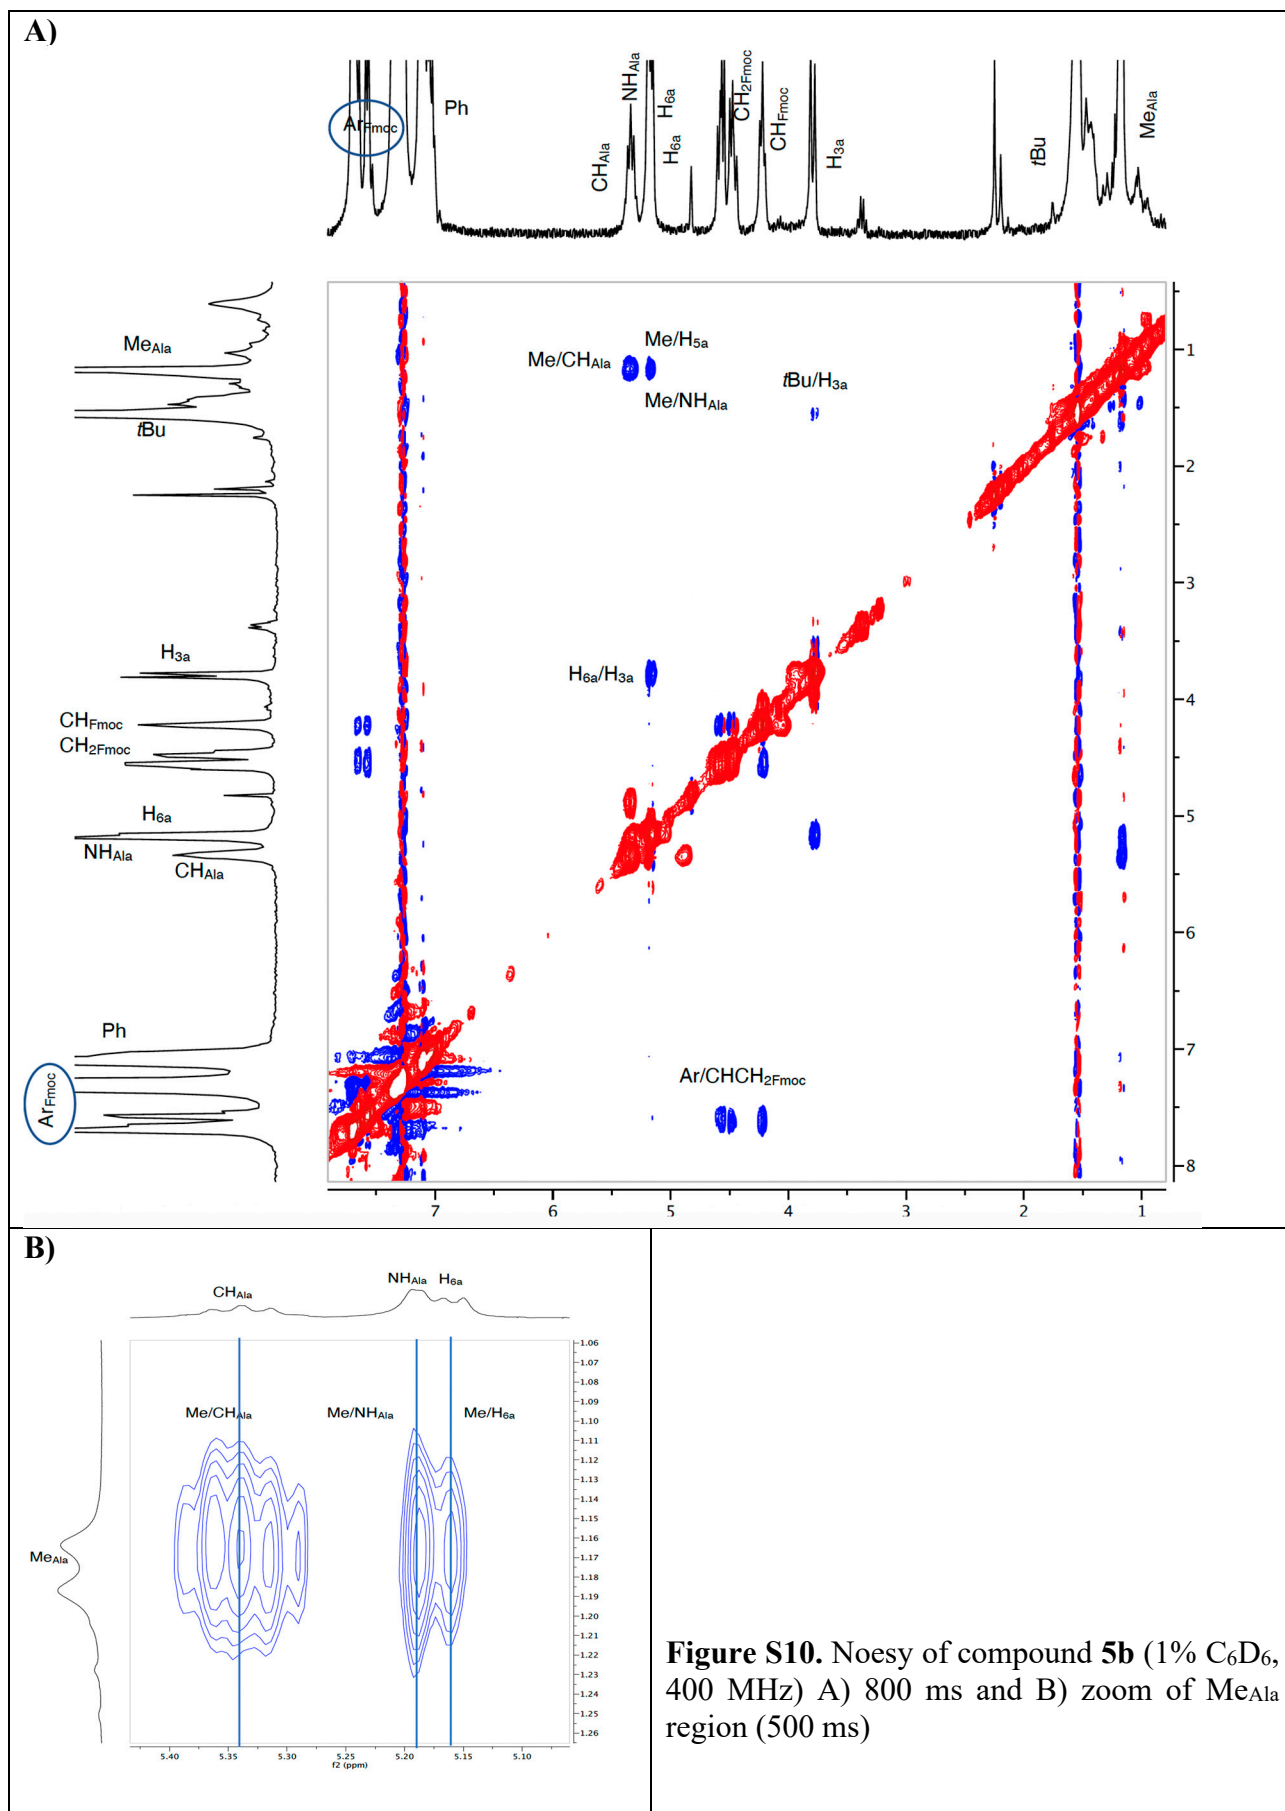

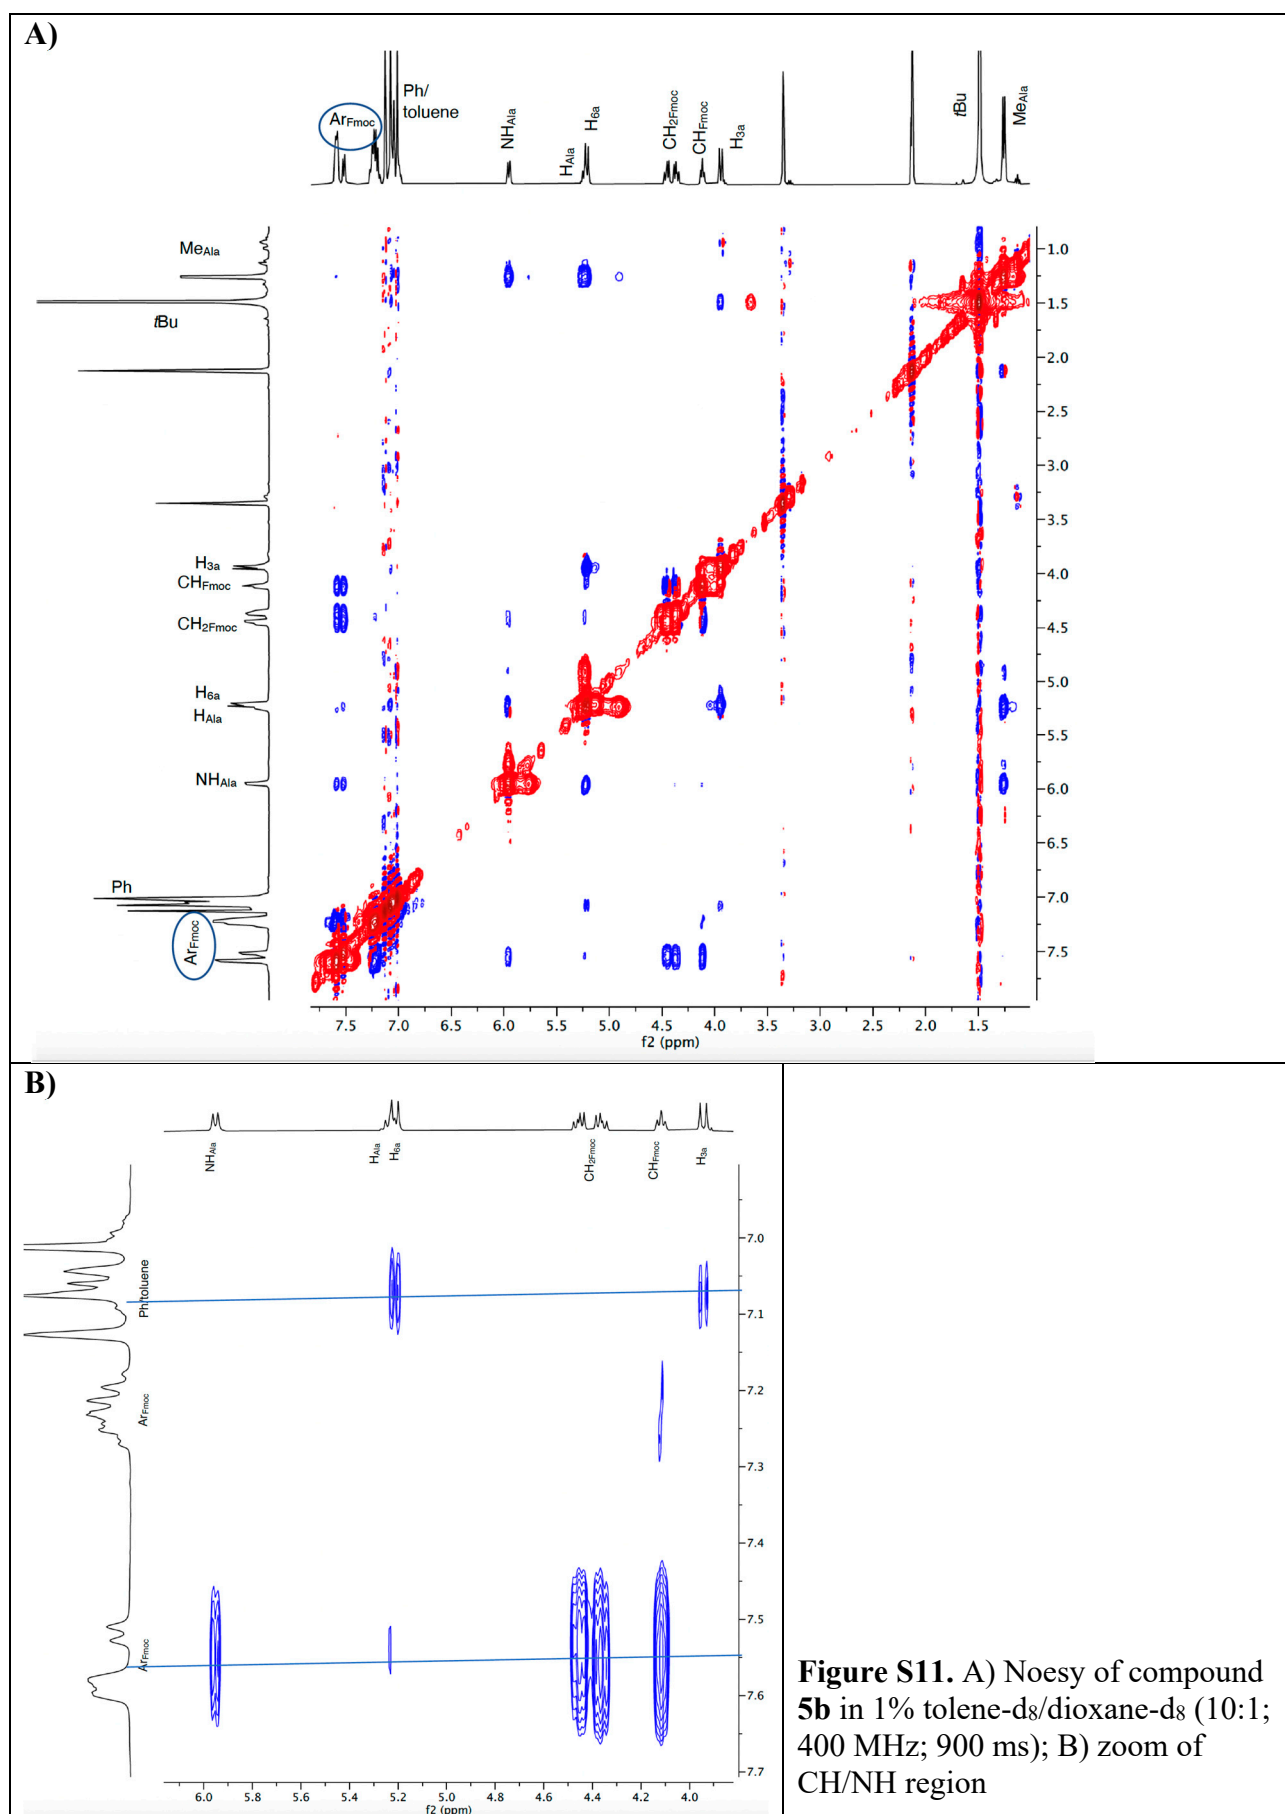

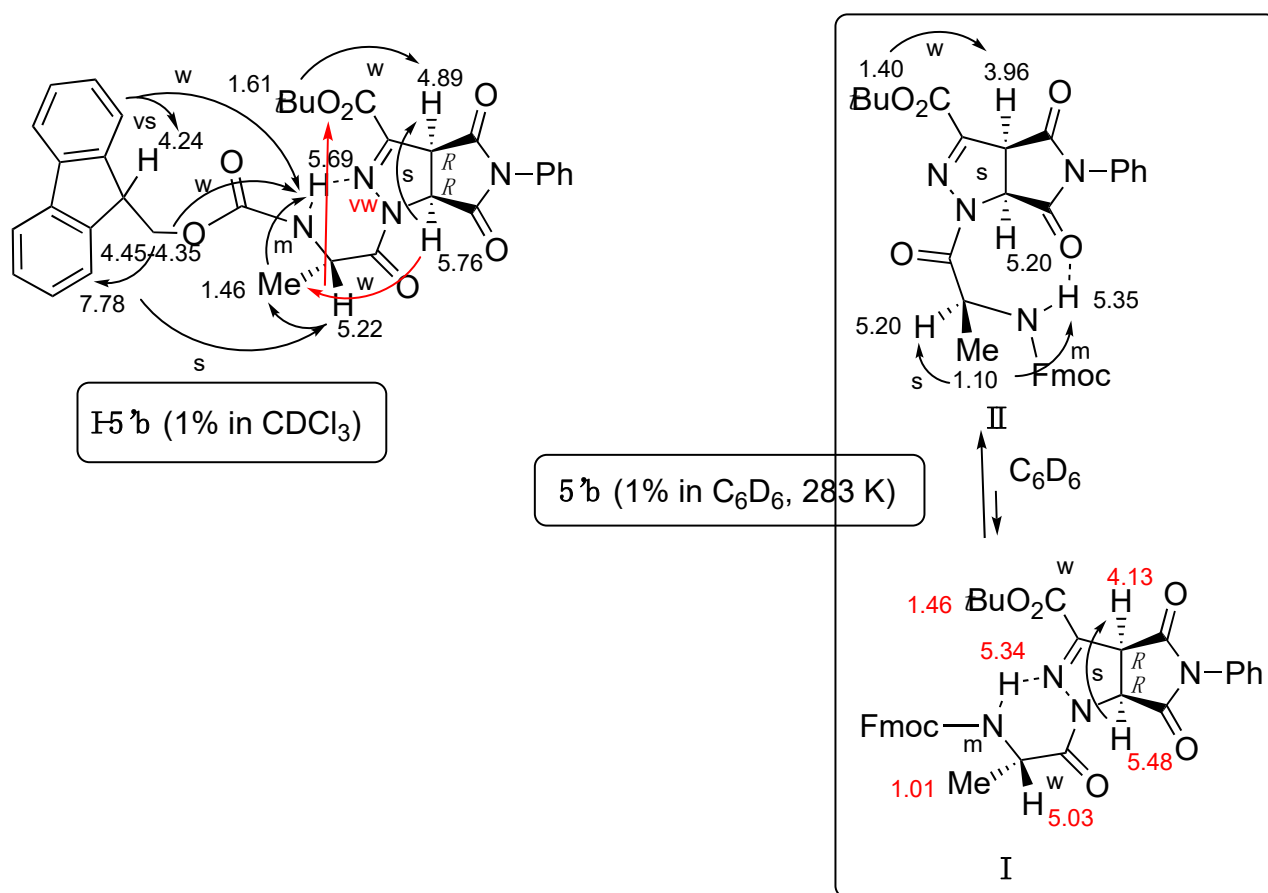

**Figure S12.** Chemical shifts, NOEs (arrow) and H-bond (dash) for compound **5'b**: main conformer **I-5'b** in CDCl<sub>3</sub> and the mixture of conformers **II-5'b** (main conformer) and **I-5'b** (minor conformer) in C<sub>6</sub>D<sub>6</sub> (400 MHz; 283 K). The Noesy experiment in C<sub>6</sub>D<sub>6</sub> was detected at 298 K (500 ms)

**Table TS6.** <sup>1</sup>H NMR chemical shifts of **5'b** (1% w/v) in different solvents at 298 K.

| Solvent                                    | H <sub>3a</sub> | H <sub>6a</sub> | NH <sub>Ala</sub> | CH <sub>Ala</sub> | Me <sub>Ala</sub> | CH <sub>Fmoc</sub> | CH <sub>2Fmoc</sub> | <i>t</i> Bu | Aromatic protons                                                          |
|--------------------------------------------|-----------------|-----------------|-------------------|-------------------|-------------------|--------------------|---------------------|-------------|---------------------------------------------------------------------------|
| CDCl <sub>3</sub>                          | 4.89            | 5.76            | 5.69              | 5.22              | 1.46              | 4.24               | 4.45-4.35           | 1.61        | Fmoc: 7.78, 7.62, 7.40, 7.34;<br>Ph: 7.52-7.26                            |
| C <sub>6</sub> D <sub>6</sub> <sup>a</sup> | 3.90            | 5.09            | 5.27              | 5.21              | 1.13              | 4.01               | 4.36-4.22           | 1.41        | Fmoc: 7.54 (2H), 7.45 (1H)<br>7.40 (1H), 7.24-7.06 (4H);<br>Ph: 7.06-6.87 |

<sup>a</sup>Conformer **I** at 298 K

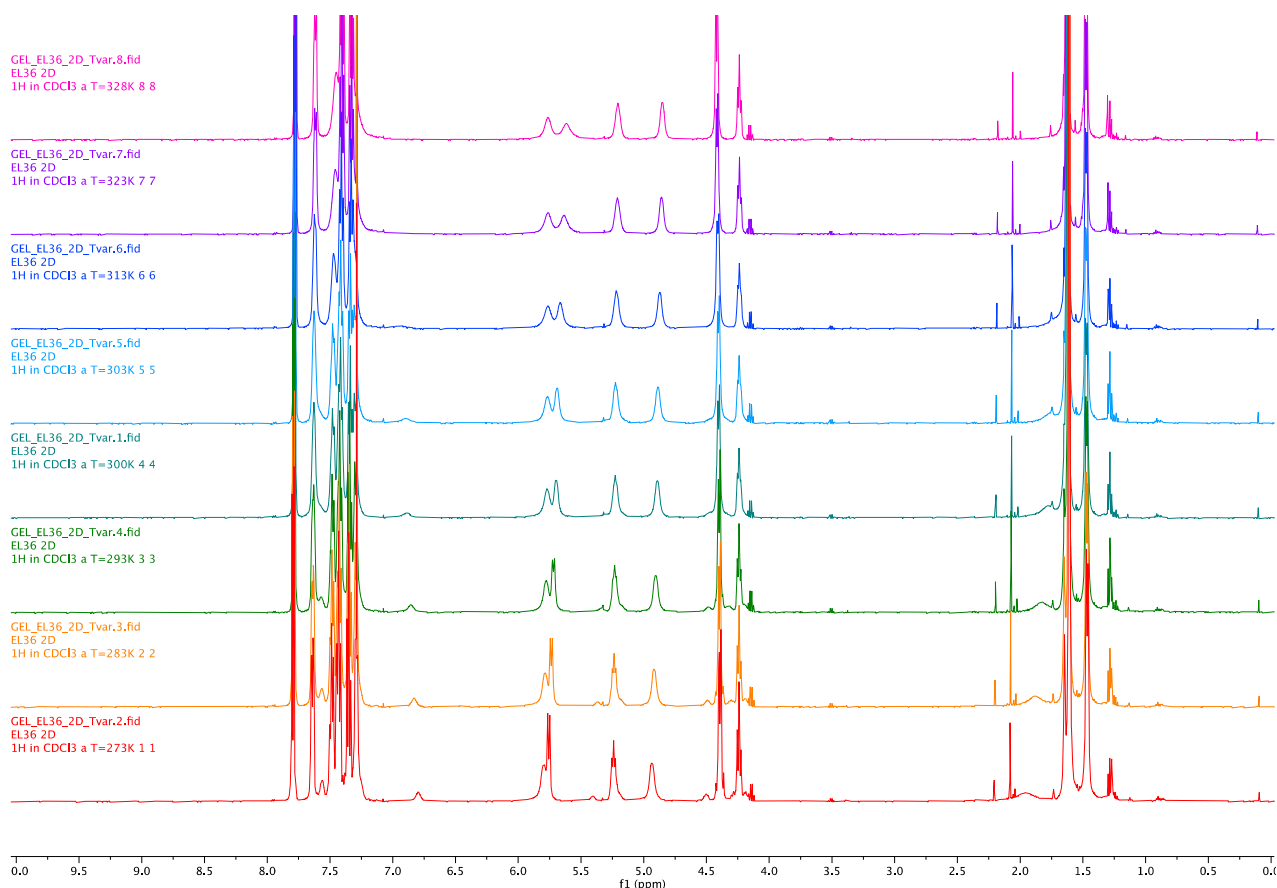

**Figure S13.**  $^1\text{H}$  NMR of compound **5'b** in  $\text{CDCl}_3$  (1%, 400 MHz) at variable temperature (273–328 K)

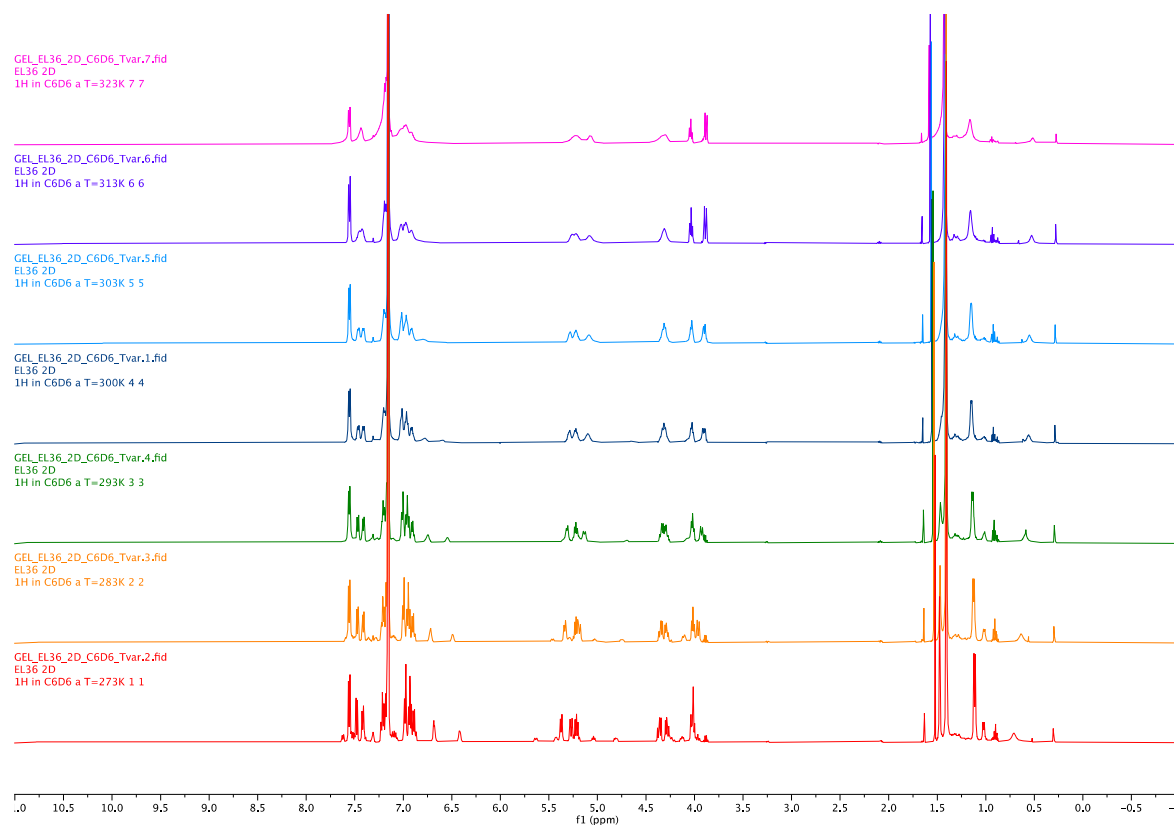

**Figure S14.**  $^1\text{H}$  NMR of compound **5'b** in  $\text{C}_6\text{D}_6$  (2% 400 MHz) at variable temperature (273–323 K)

A)

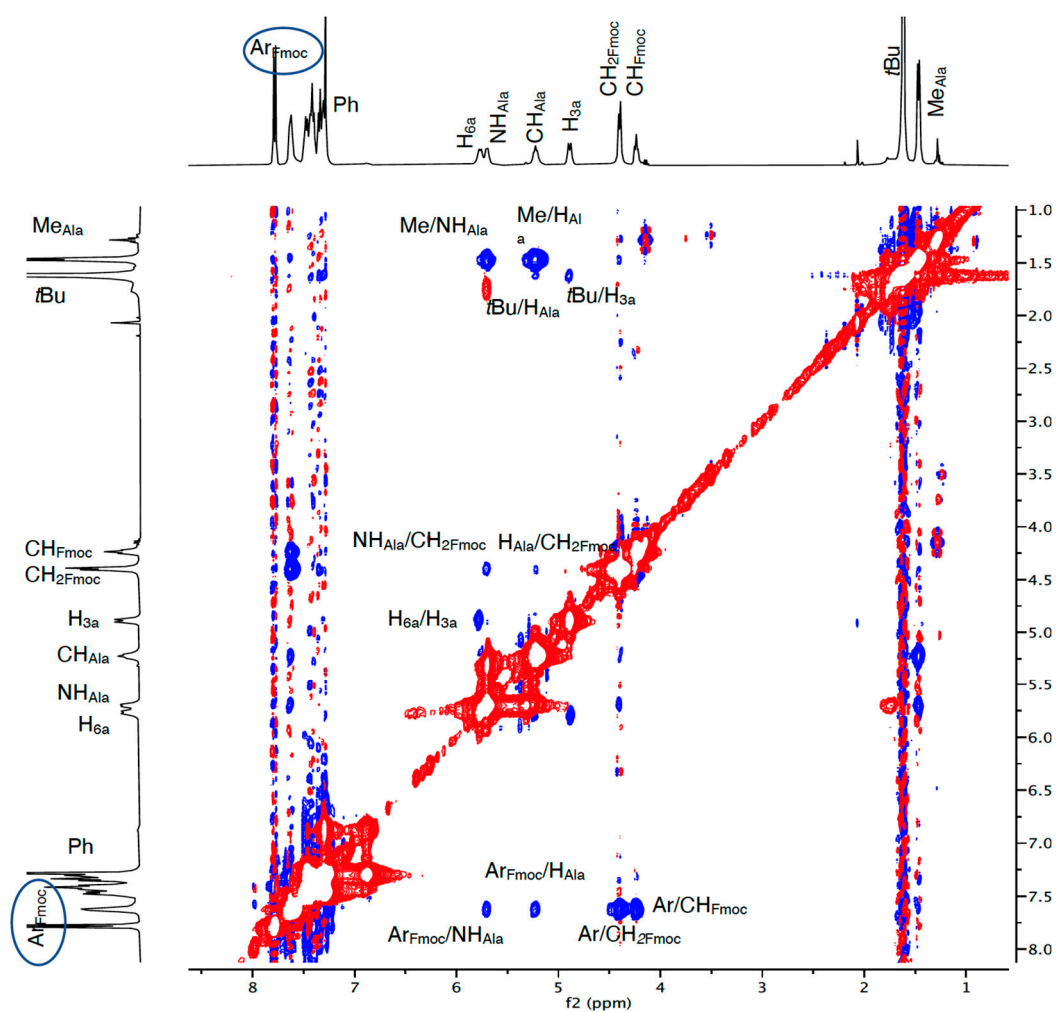

B)

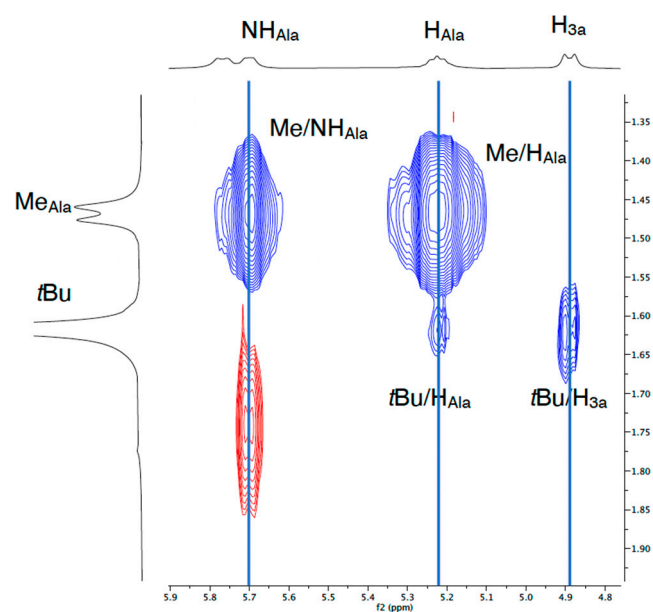

**Figure S15.** A) Nocsy of compound **5'b** (1% CDCl<sub>3</sub>, 400 MHz, 300 ms); B) zoom of Me/CH,NH region

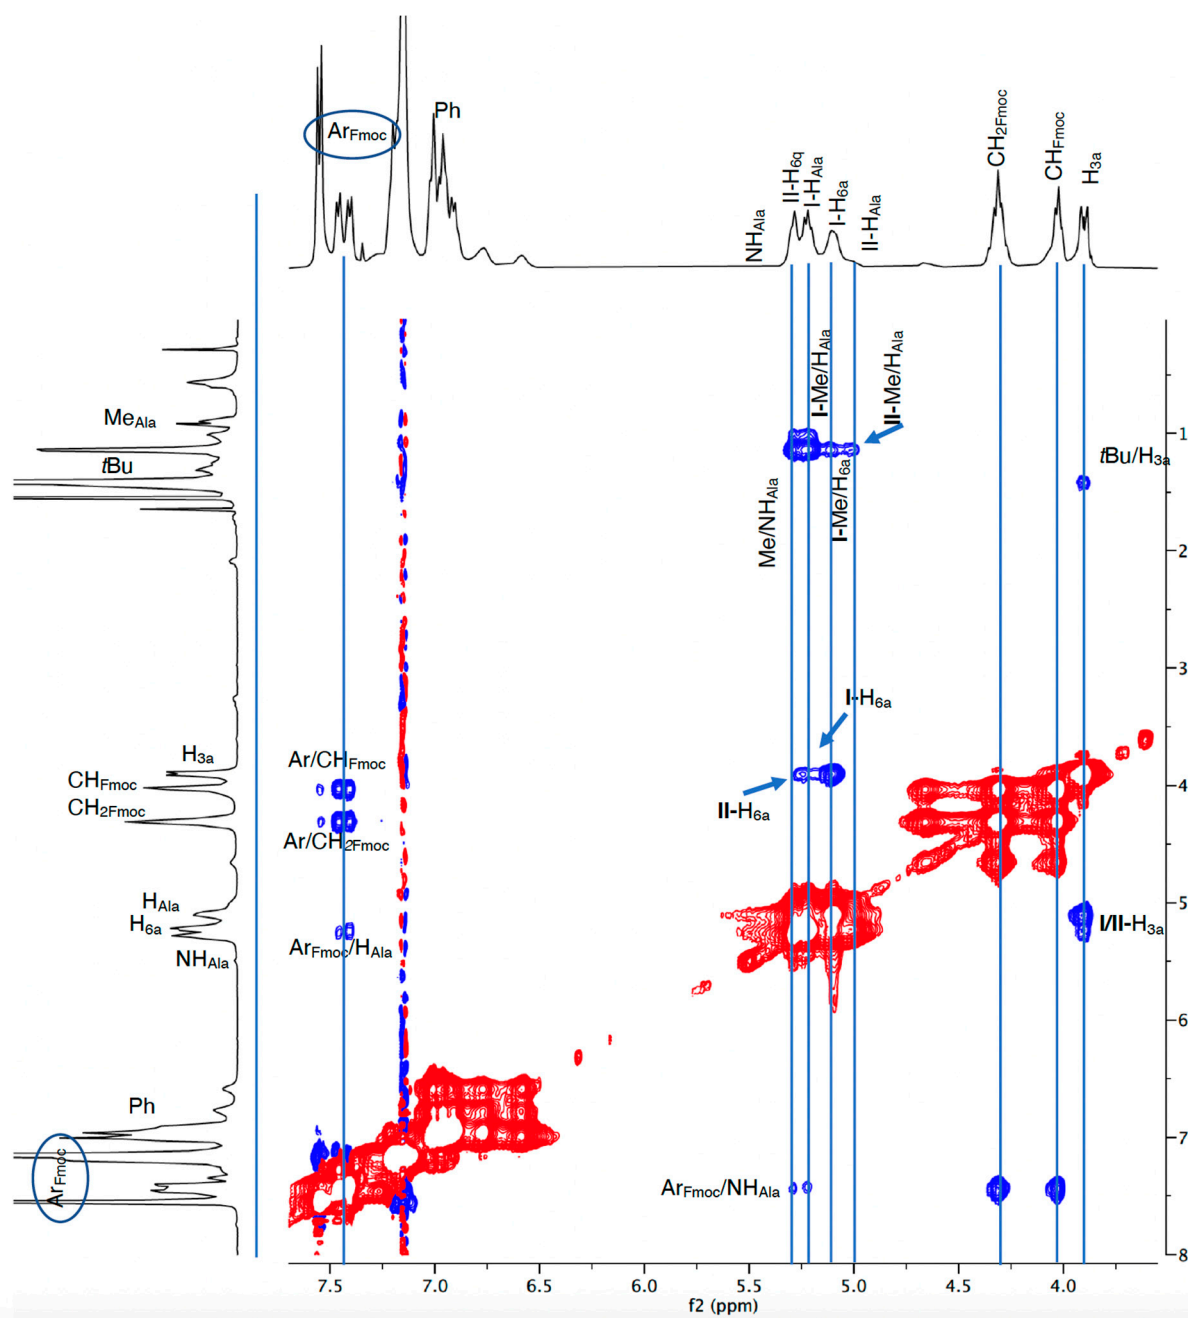

**Figure S16.** Noesy of compound **5'b** (1% C<sub>6</sub>D<sub>6</sub>, 400 MHz) at 500 ms and 300 K.

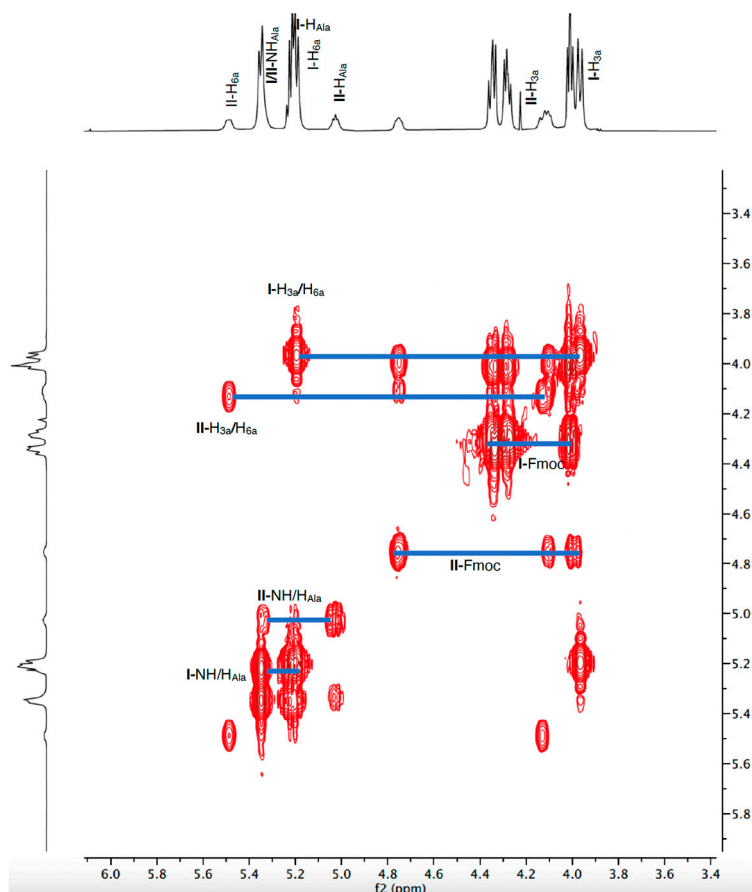

**Figure S17.** Cosp of compound **5'b** (1% C<sub>6</sub>D<sub>6</sub>, 400 MHz) at 283 K.

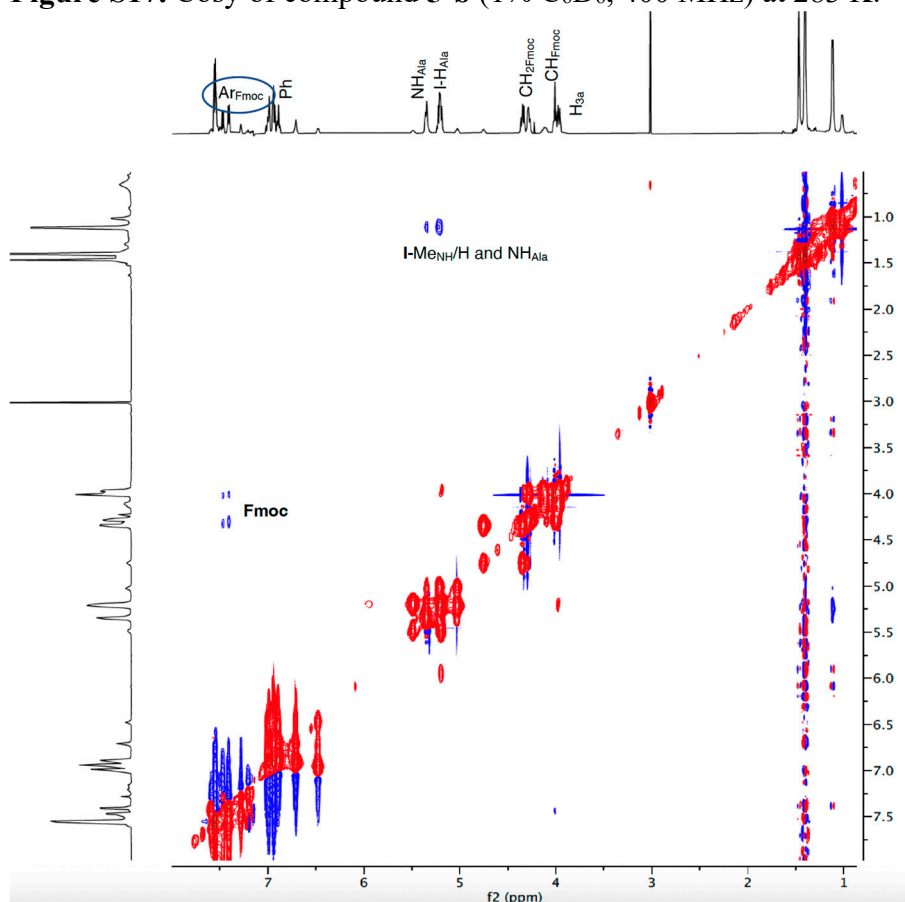

**Figure S18.** NOESY of compound **5'b** (1% C<sub>6</sub>D<sub>6</sub>, 500 MHz) at 500 ms and 283 K.

#### 4. NMR SPECTRA OF COMPOUNDS 3, 4 AND 5/5'

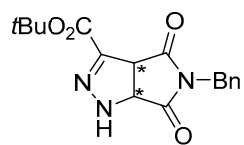

**3c**

$^1\text{H}$  NMR ( $\text{CDCl}_3$ , 300 MHz, 300 K)

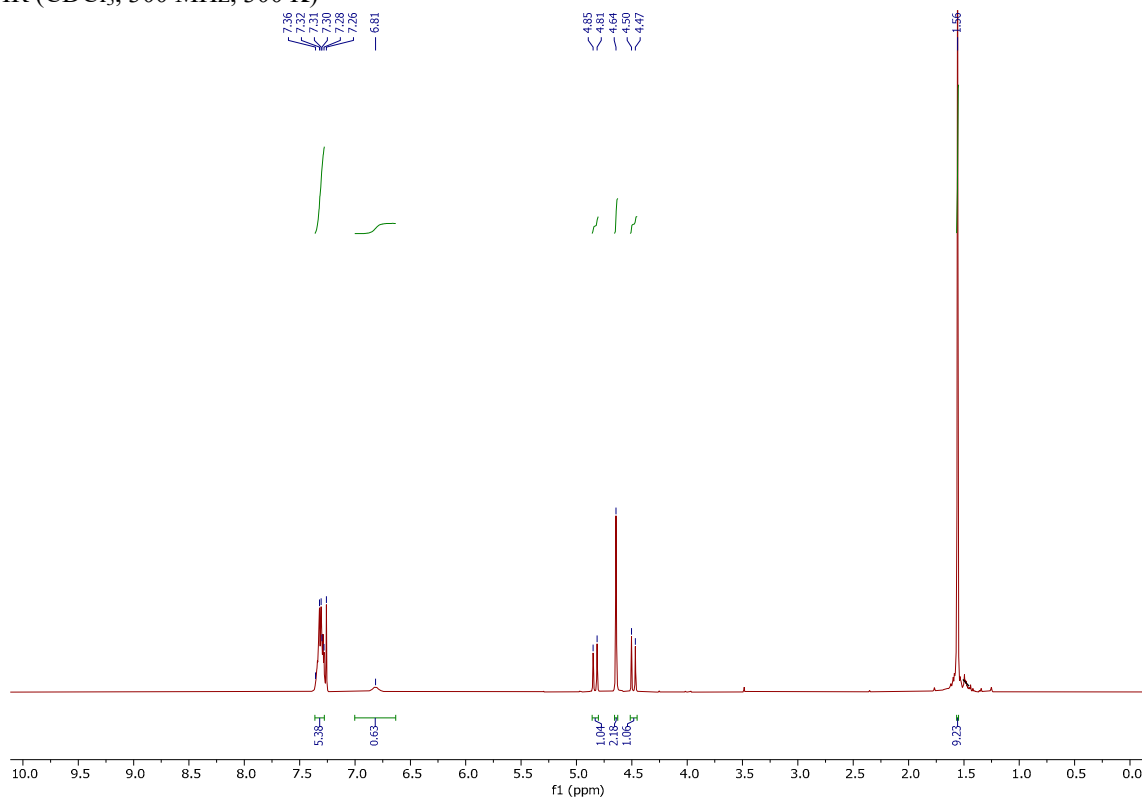

$^{13}\text{C}$  NMR ( $\text{CDCl}_3$ , 75 MHz, 300 K)

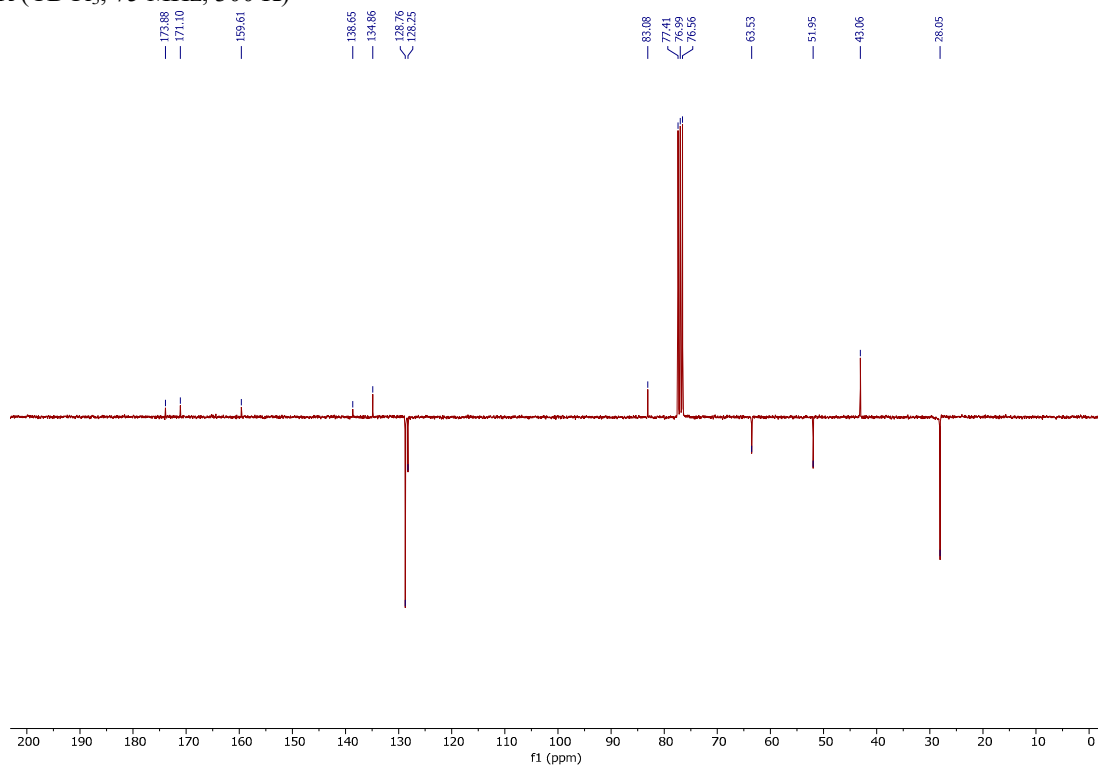

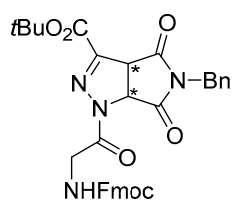

**4c**

<sup>1</sup>H NMR (DMSO-d<sub>6</sub>, 300 MHz, 300 K)

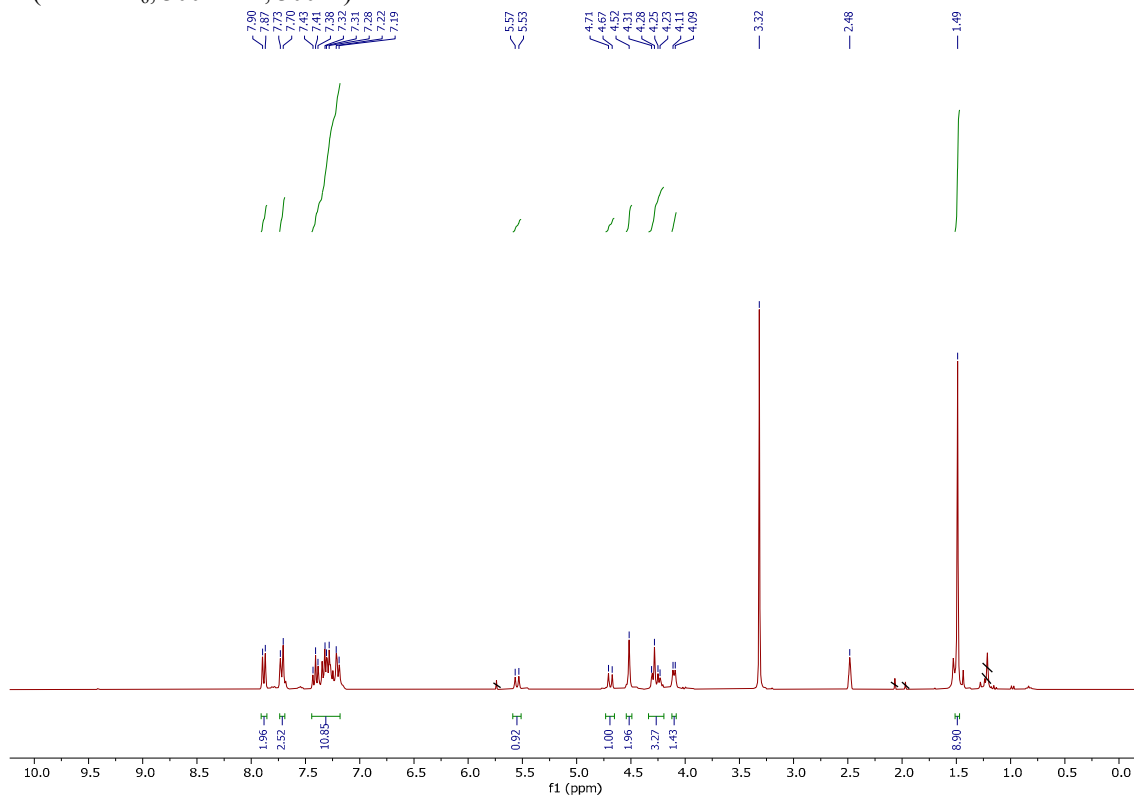

<sup>13</sup>C NMR (DMSO-d<sub>6</sub>, 75 MHz, 300 K)

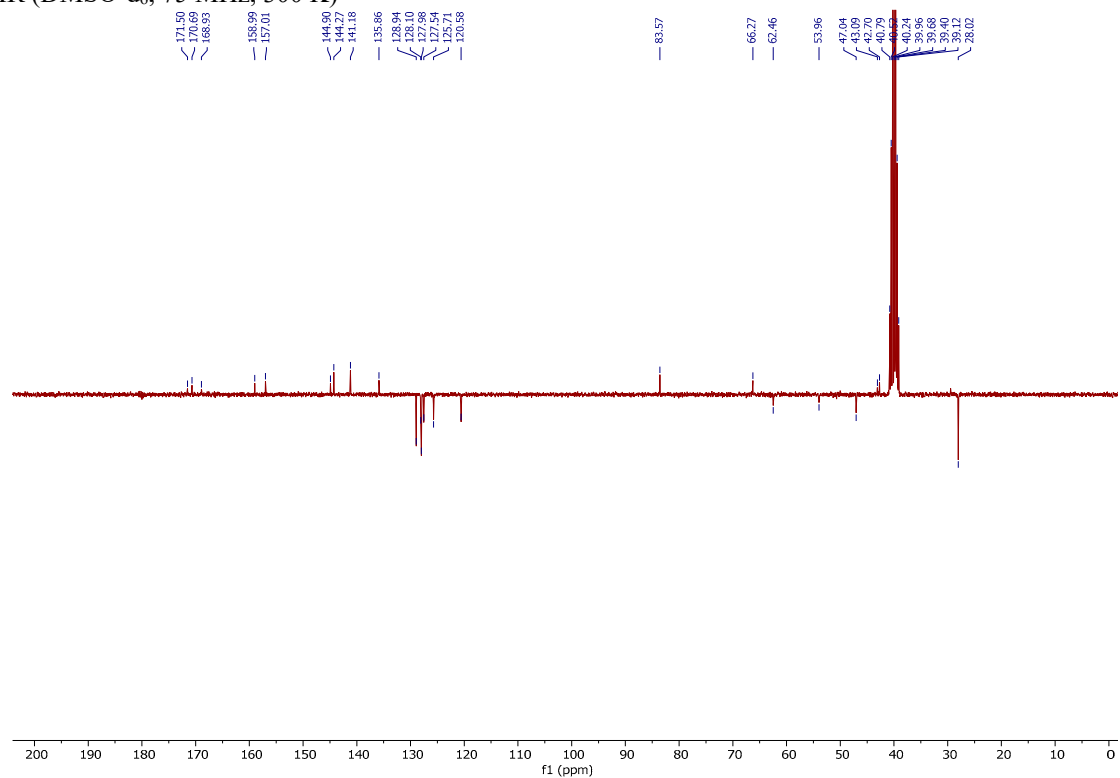

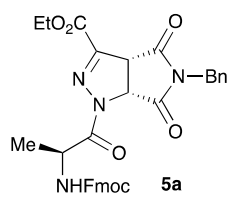

$^1\text{H}$  NMR ( $\text{CDCl}_3$ , 300 MHz, 300 K)

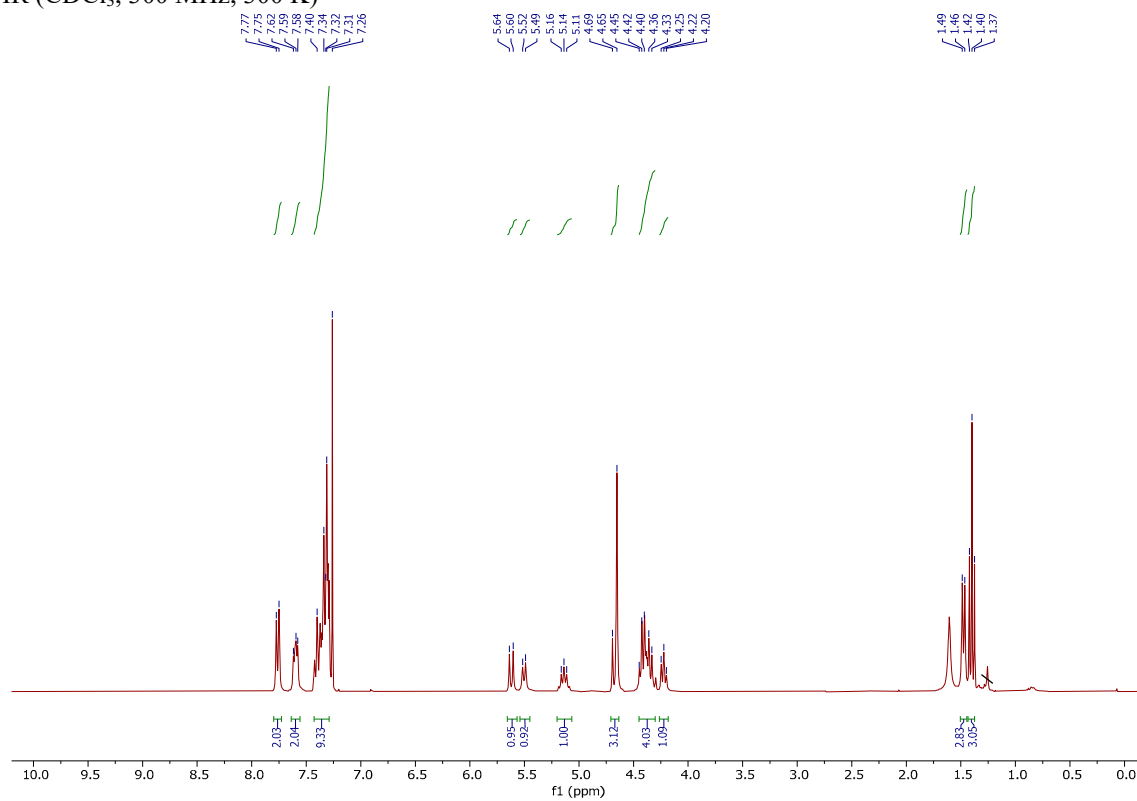

$^{13}\text{C}$  NMR ( $\text{CDCl}_3$ , 100.7 MHz, 300 K)

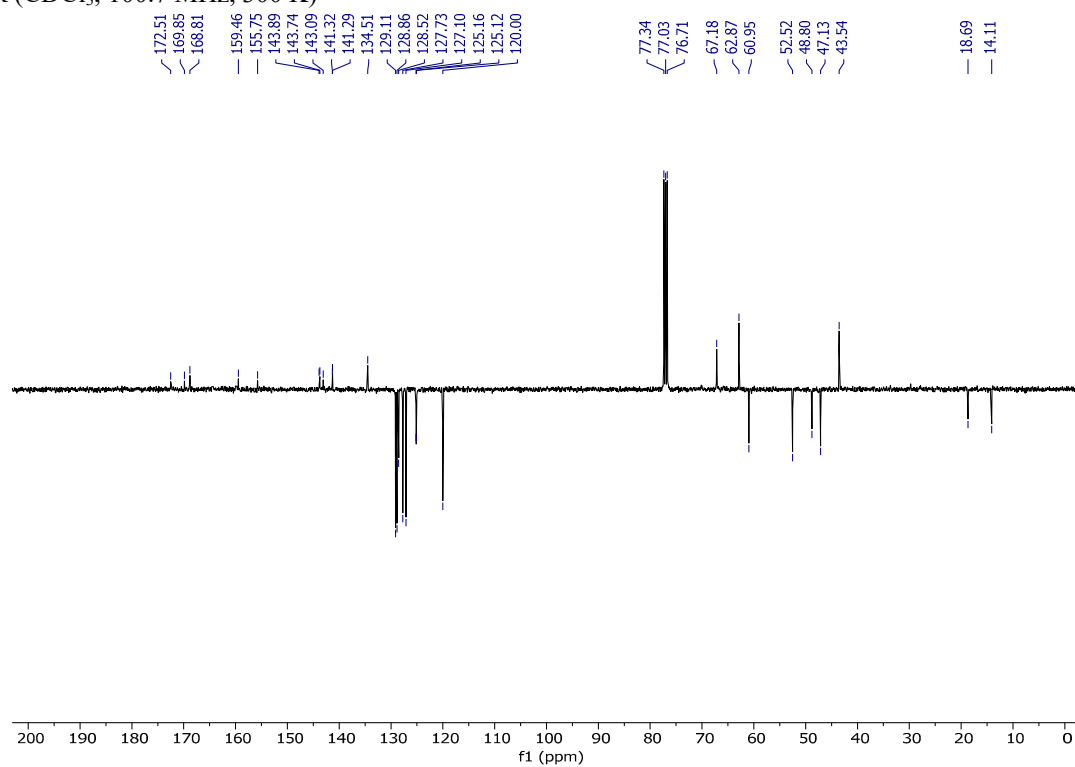

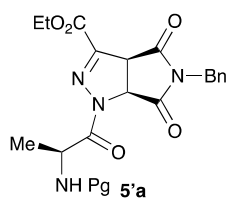

$^1\text{H}$  NMR ( $\text{CDCl}_3$ , 300 MHz, 300 K)

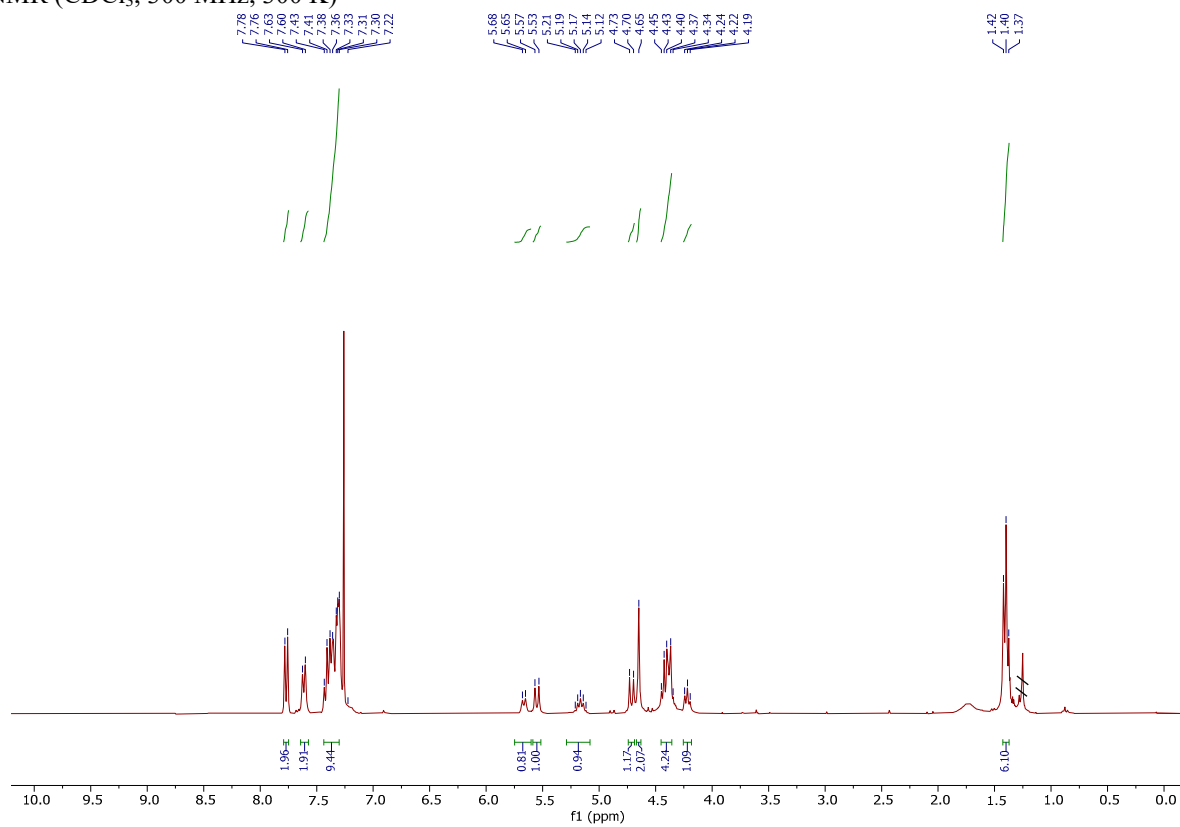

$^{13}\text{C}$  NMR ( $\text{CDCl}_3$ , 75 MHz, 300 K)

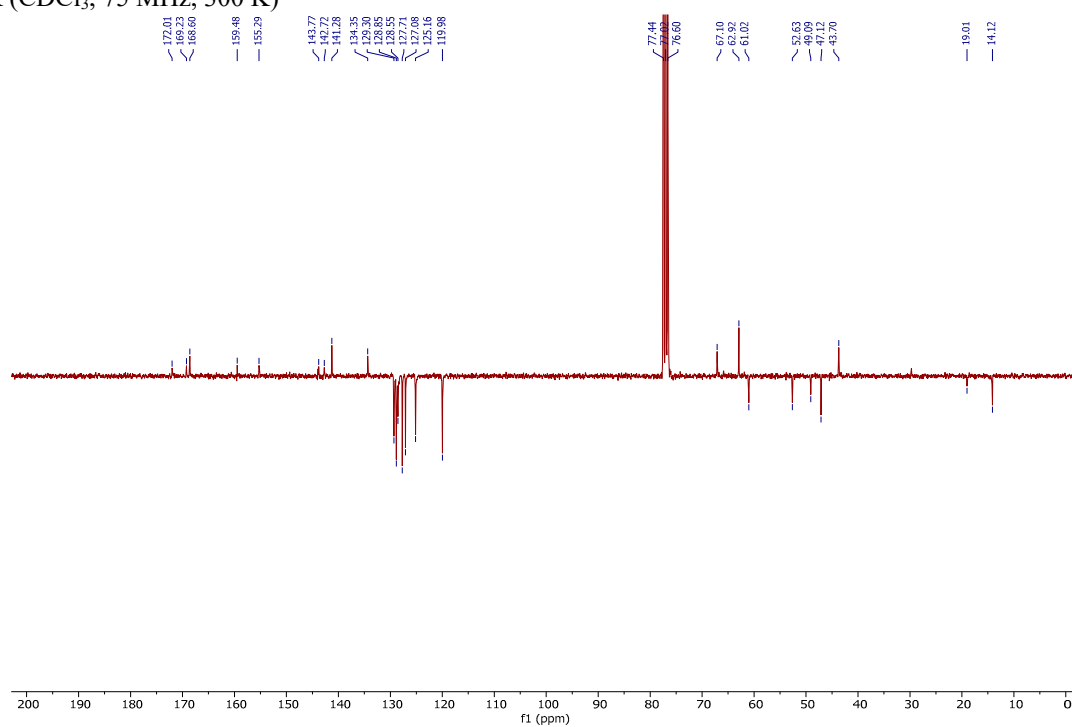

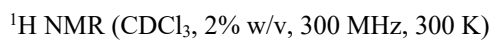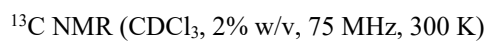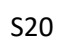

$^1\text{H}$  NMR ( $\text{CDCl}_3$ , 1% w/v, 400 MHz, 300 K)

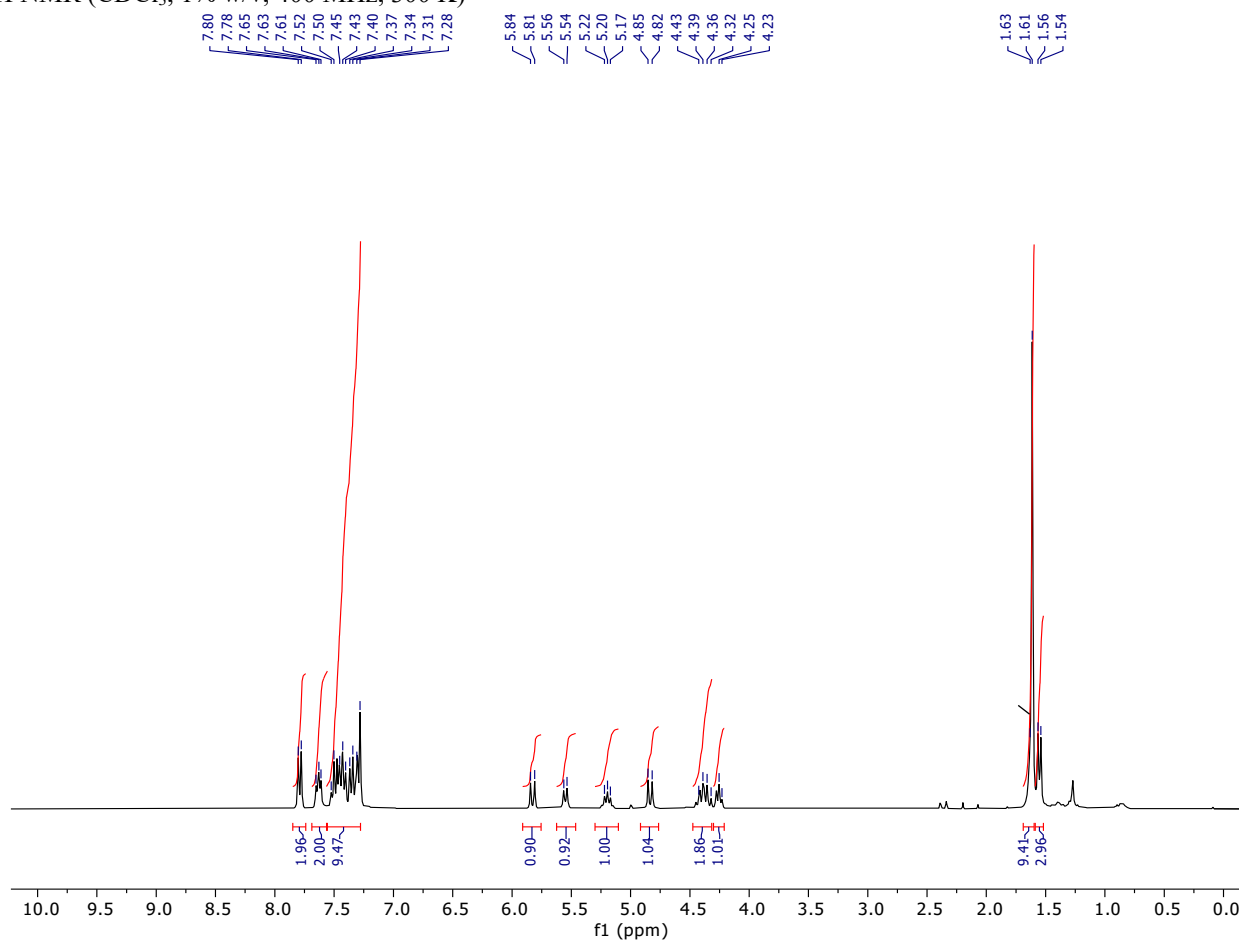

COSY NMR ( $\text{CDCl}_3$ , 1% w/v, 400 MHz, 300 K)

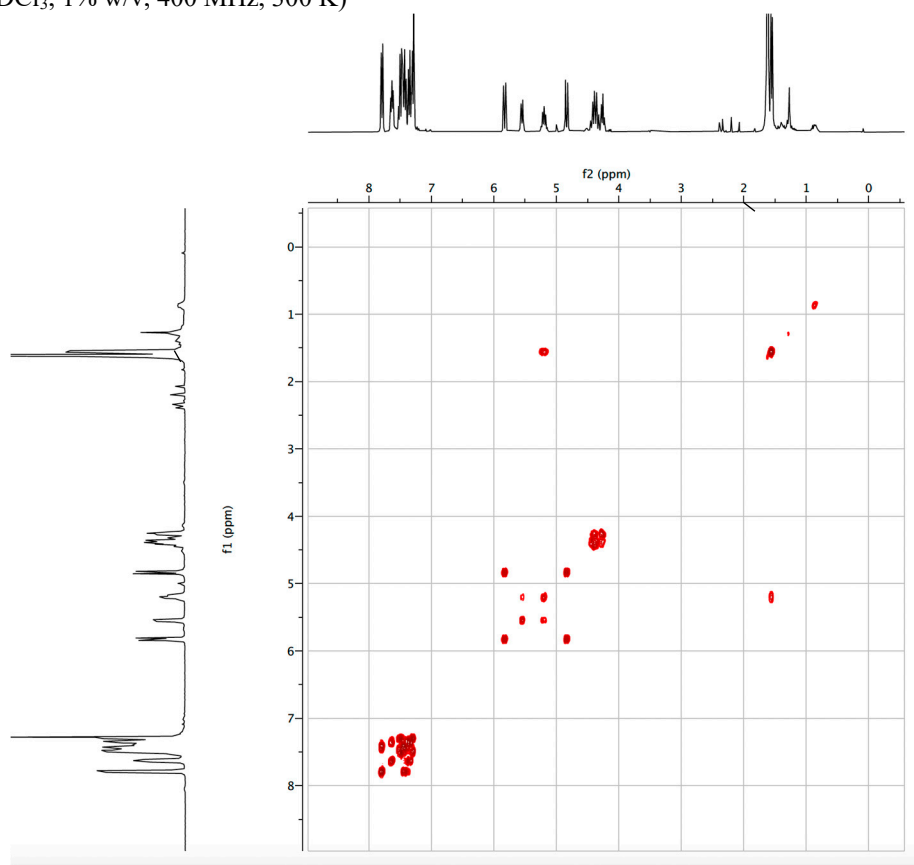

NOESY-NMR ( $\text{CDCl}_3$ , 1% w/v, 400 MHz, 300 K,  $t_{\text{mix}} = 800$  ms)

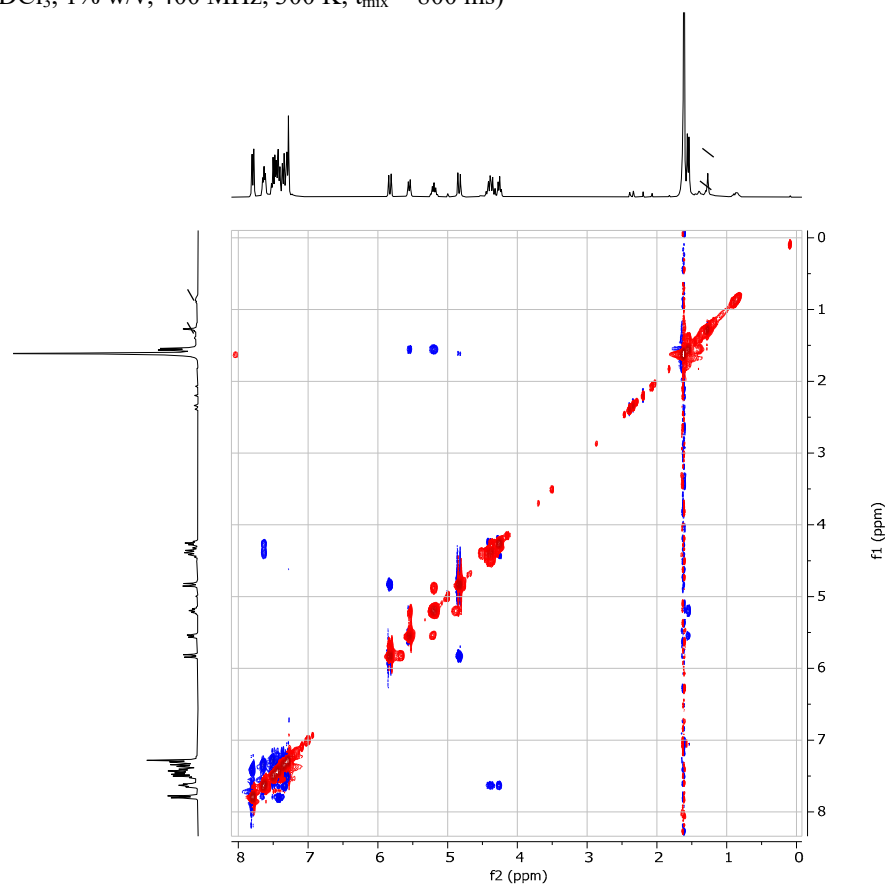

NOESY-NMR ( $\text{CDCl}_3$ , 1% w/v, 400 MHz, 300 K,  $t_{\text{mix}} = 1$  s)

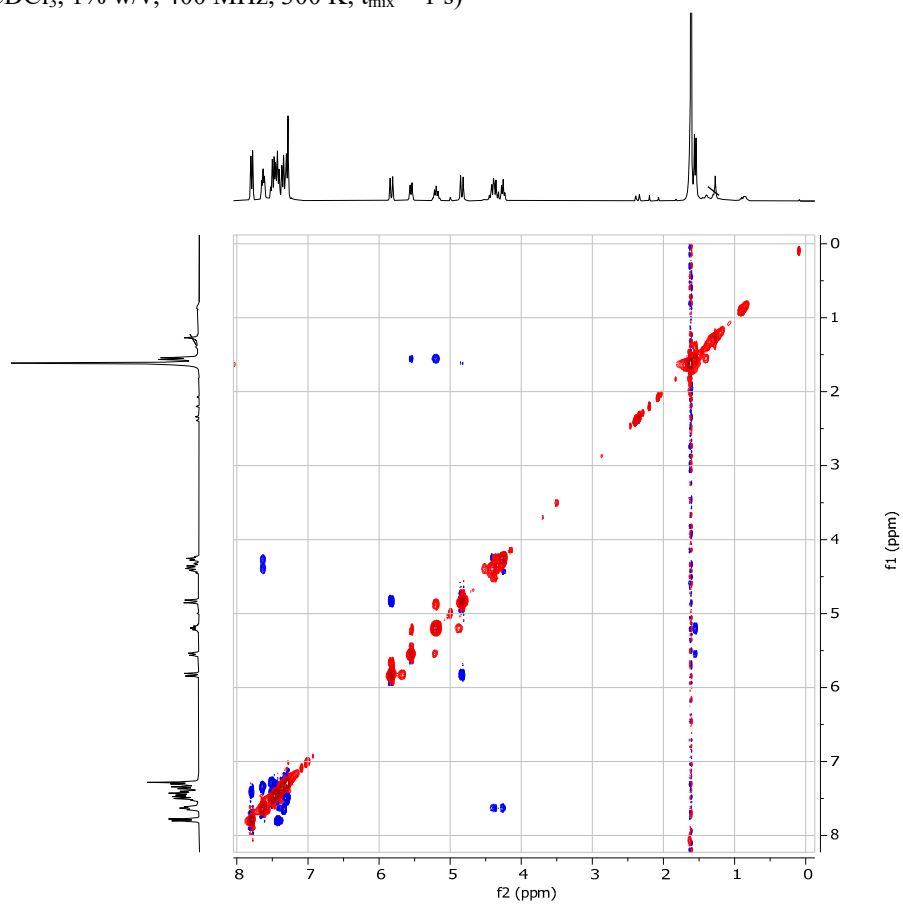

$^1\text{H}$  NMR ( $\text{C}_6\text{D}_6$ , 1% w/v, 400 MHz, 300 K)

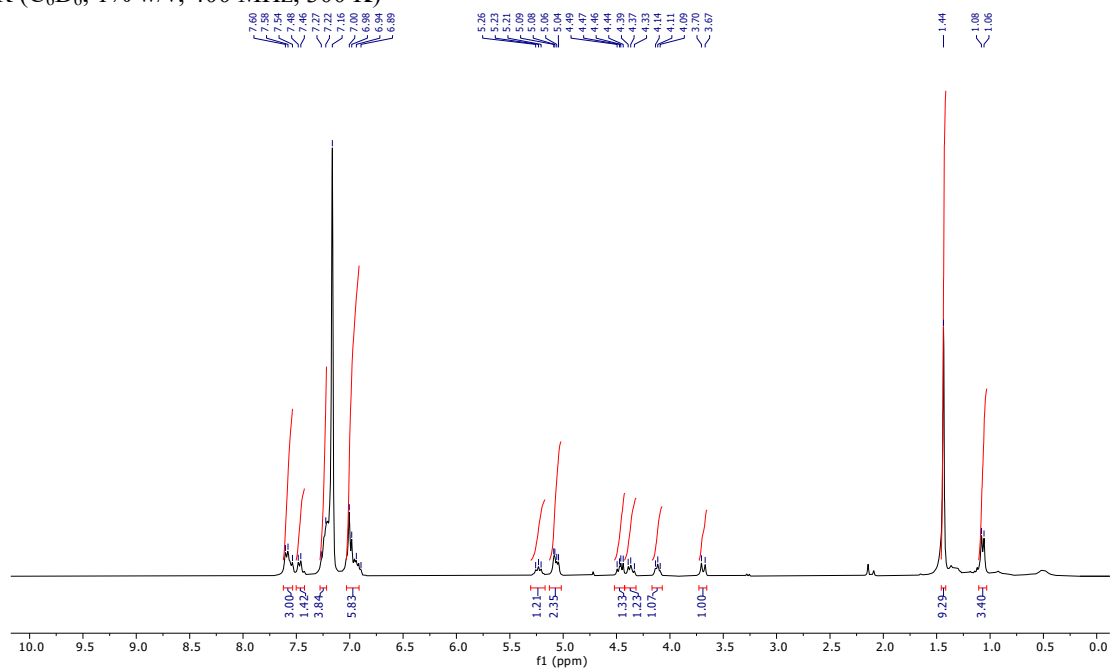

COSY-NMR ( $\text{C}_6\text{D}_6$ , 1% w/v, 400 MHz, 300 K)

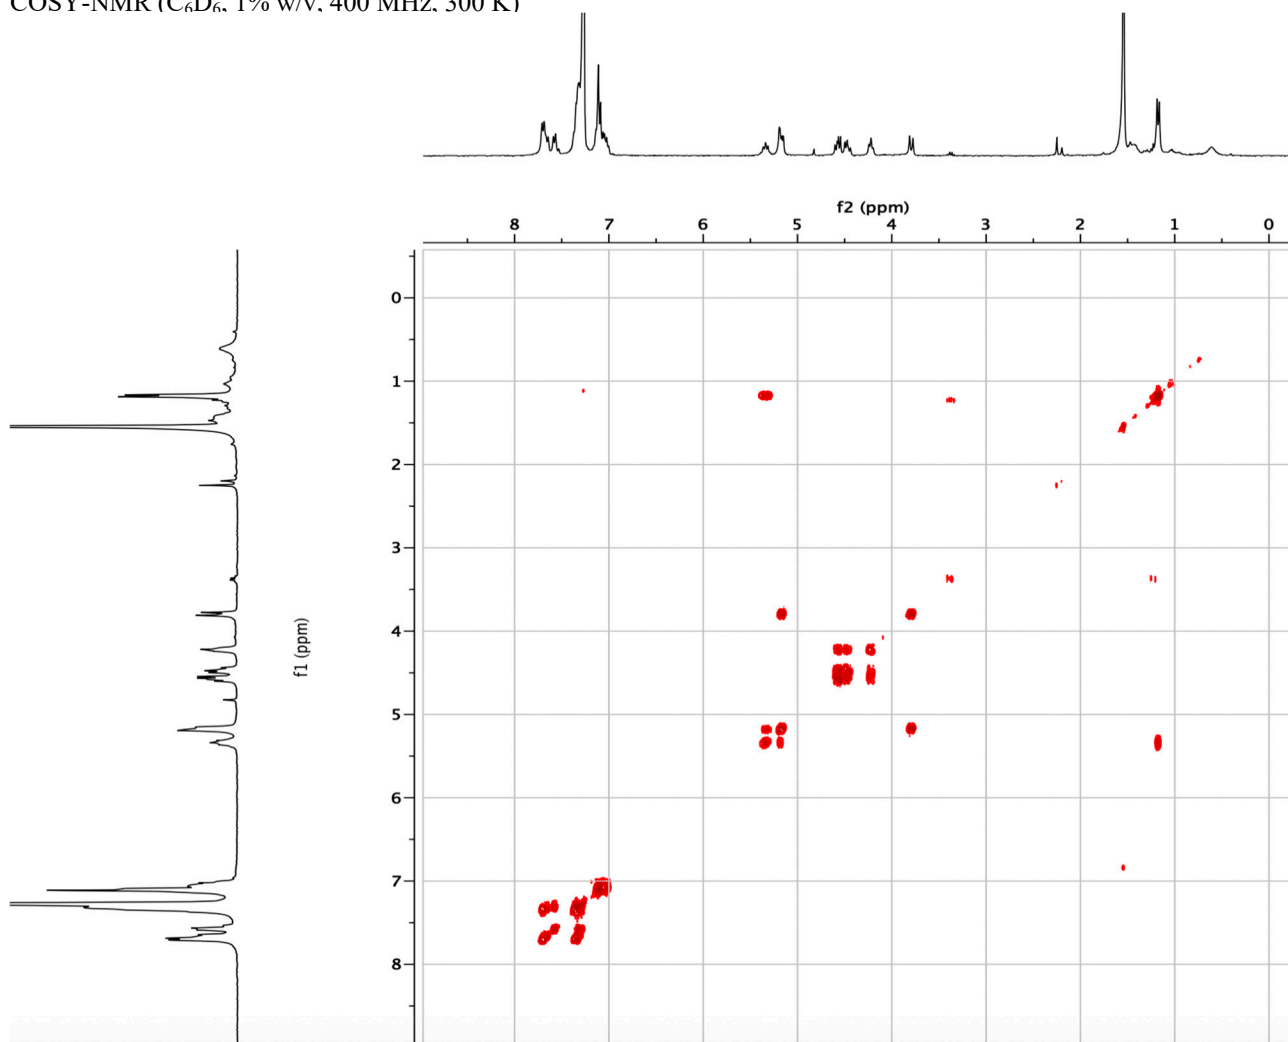

$^1\text{H}$  NMR (toluene- $\text{d}_8$ /dioxane- $\text{d}_8$  (10:1), 1% w/v, 400 MHz, 300 K)

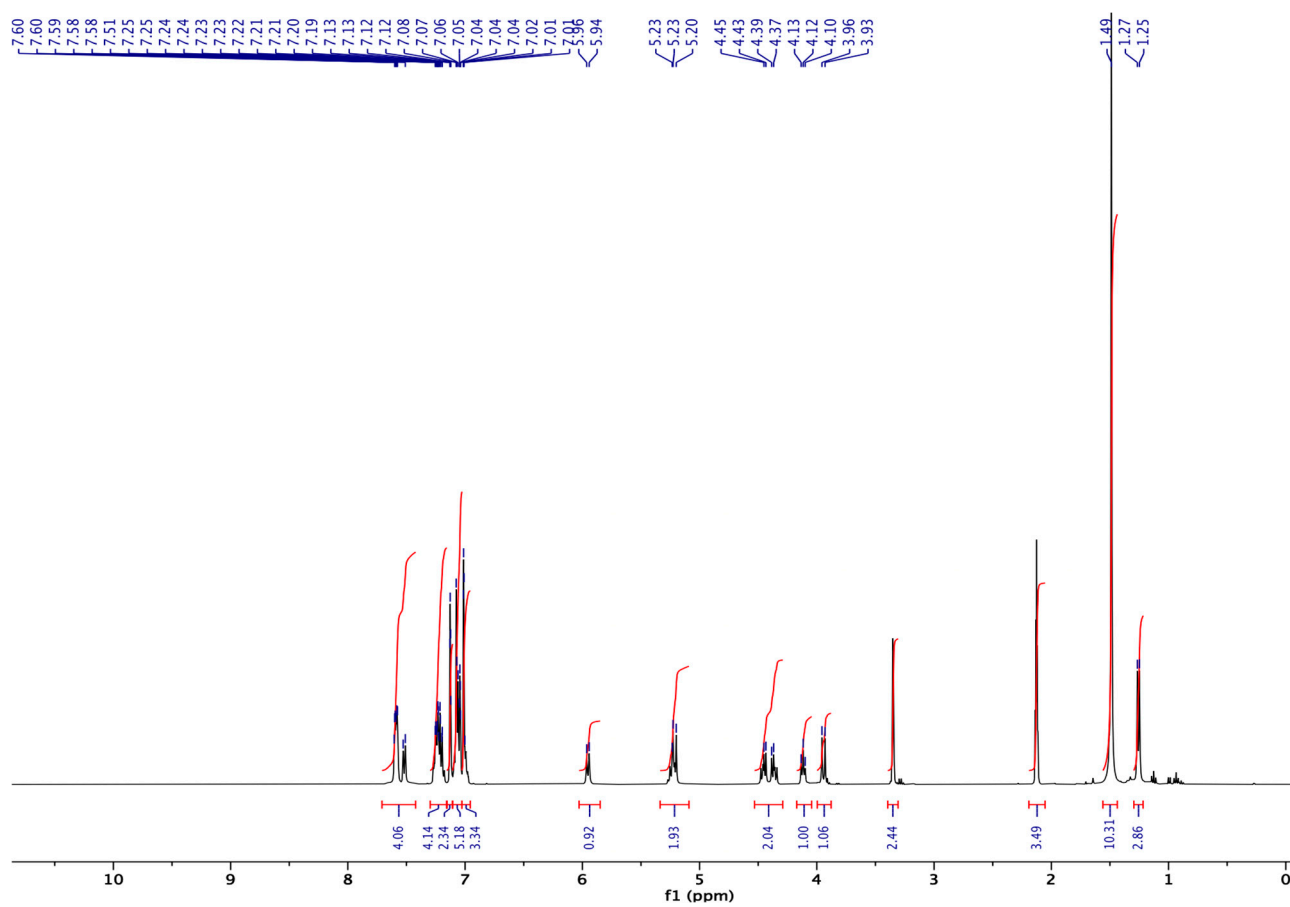

COSY-NMR (toluene- $\text{d}_8$ /dioxane- $\text{d}_8$  (10:1), 1% w/v, 400 MHz, 300 K)

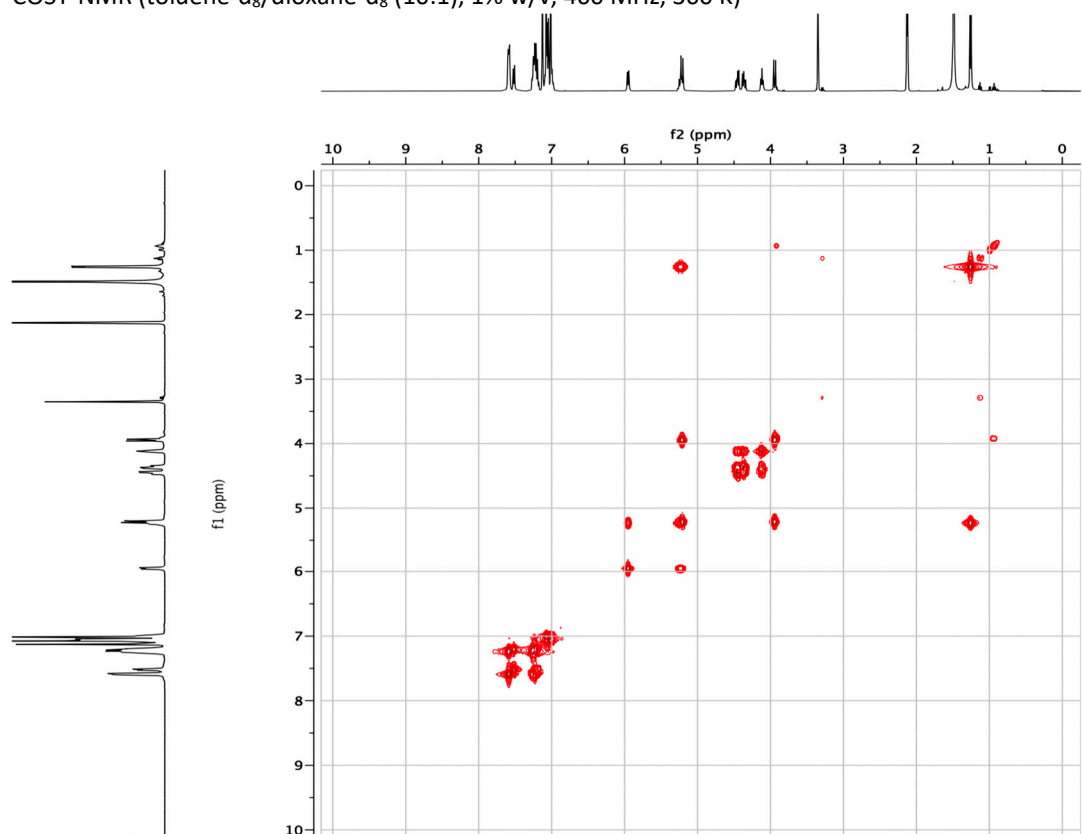

$^{13}\text{C}$  NMR (toluene- $d_8$ /dioxane- $d_8$  (10:1), 1% w/v, 100.7 MHz, 300 K)

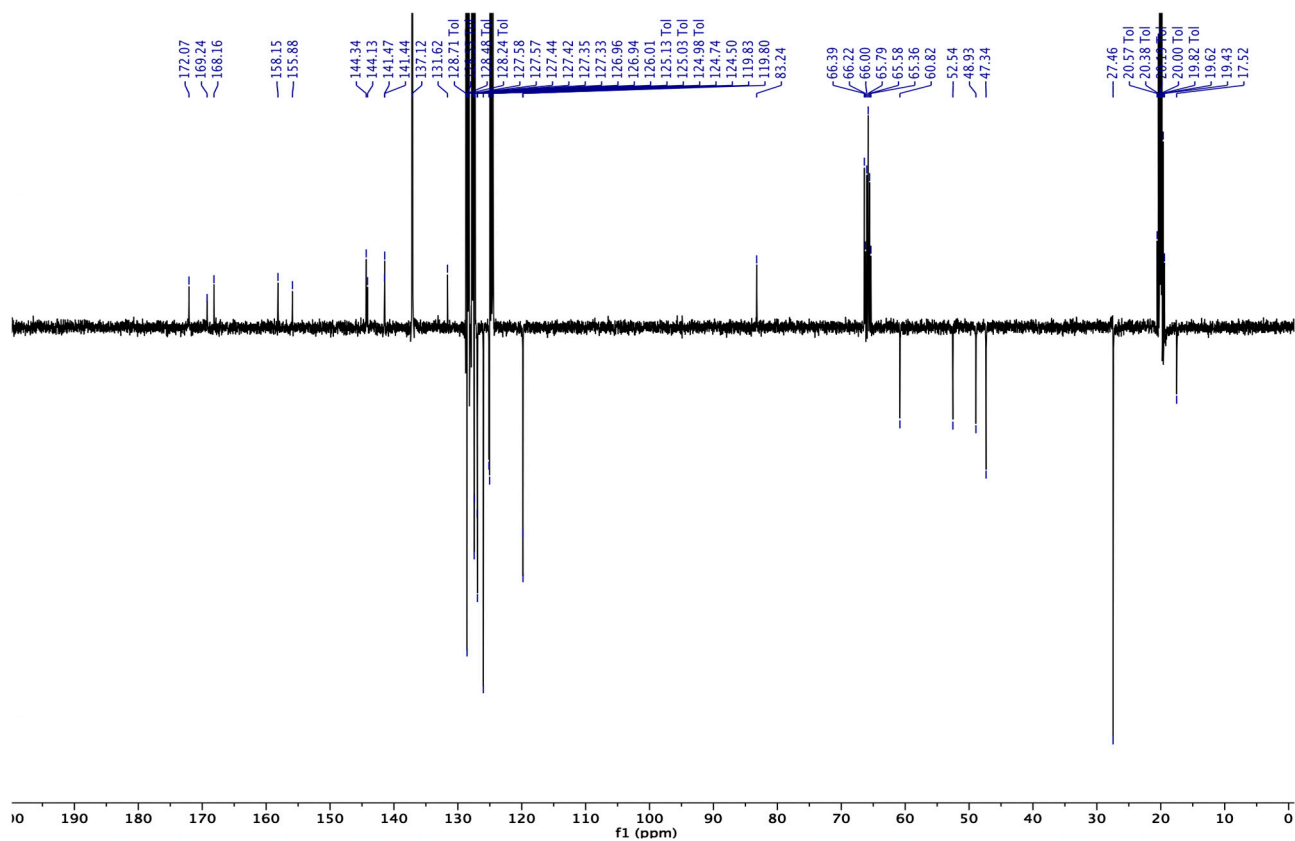

HSQC-NMR (toluene- $d_8$ /dioxane- $d_8$  (10:1), 1% w/v, 400 MHz, 100.7 MHz, 300 K)

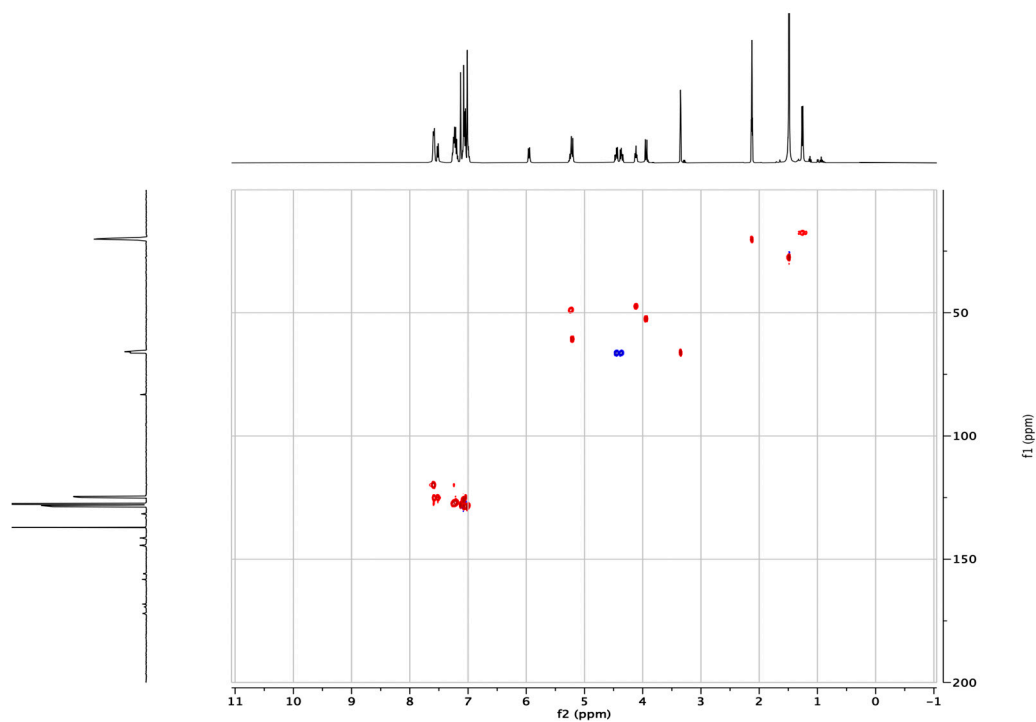

NOESY-NMR (toluene-d<sub>8</sub>/dioxane-d<sub>8</sub> (10:1), 1% w/v, 400 MHz, 300 K,  $t_{\text{mix}} = 300$  ms)

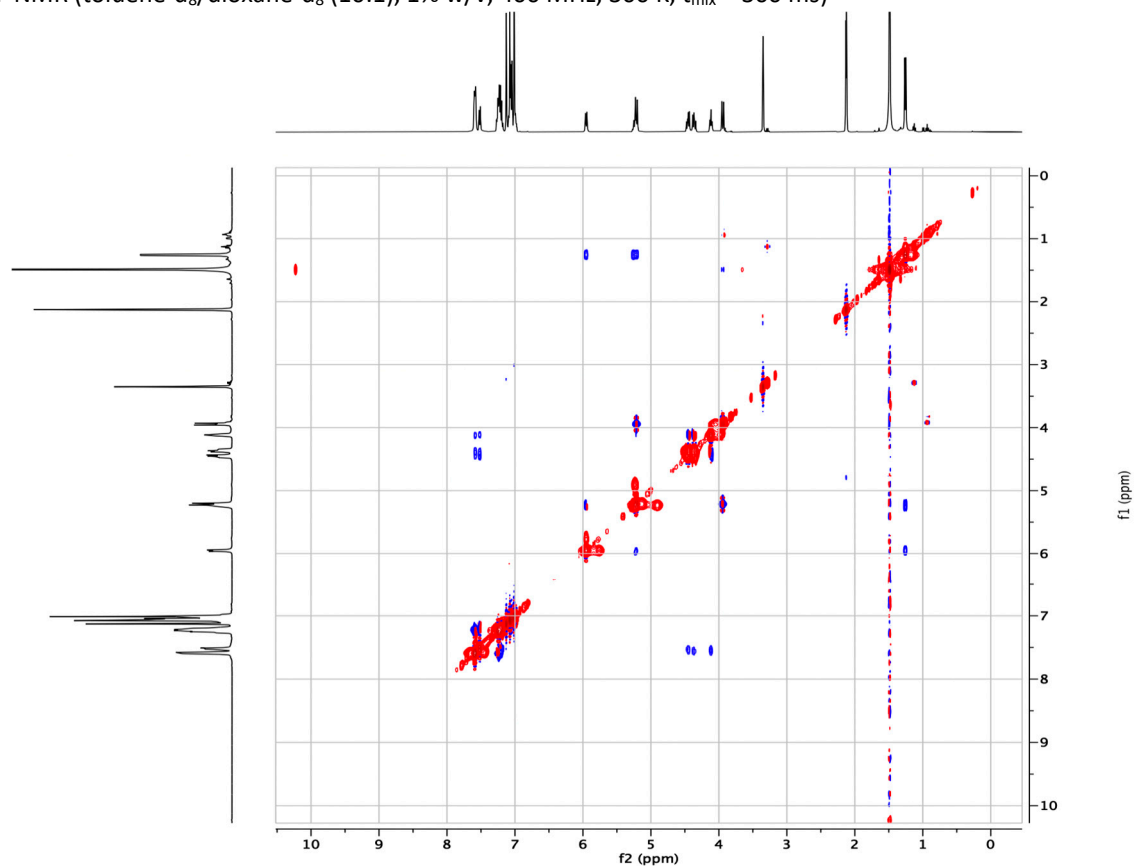

NOESY-NMR (toluene-d<sub>8</sub>/dioxane-d<sub>8</sub> (10:1), 1% w/v, 400 MHz, 300 K,  $t_{\text{mix}} = 600$  ms)

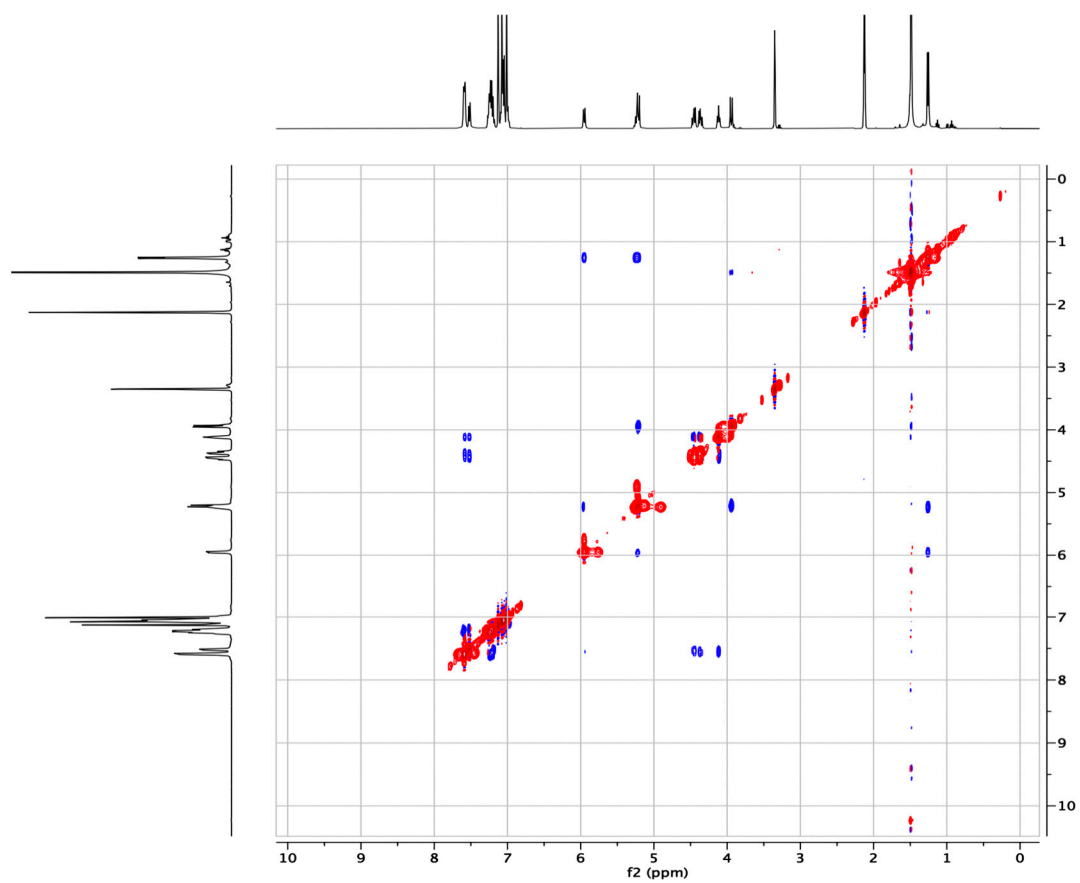

$^1\text{H}$  NMR ( $\text{CDCl}_3/\text{C}_6\text{D}_6$ , 1:1, 1% w/v, 400 MHz, 300 K)

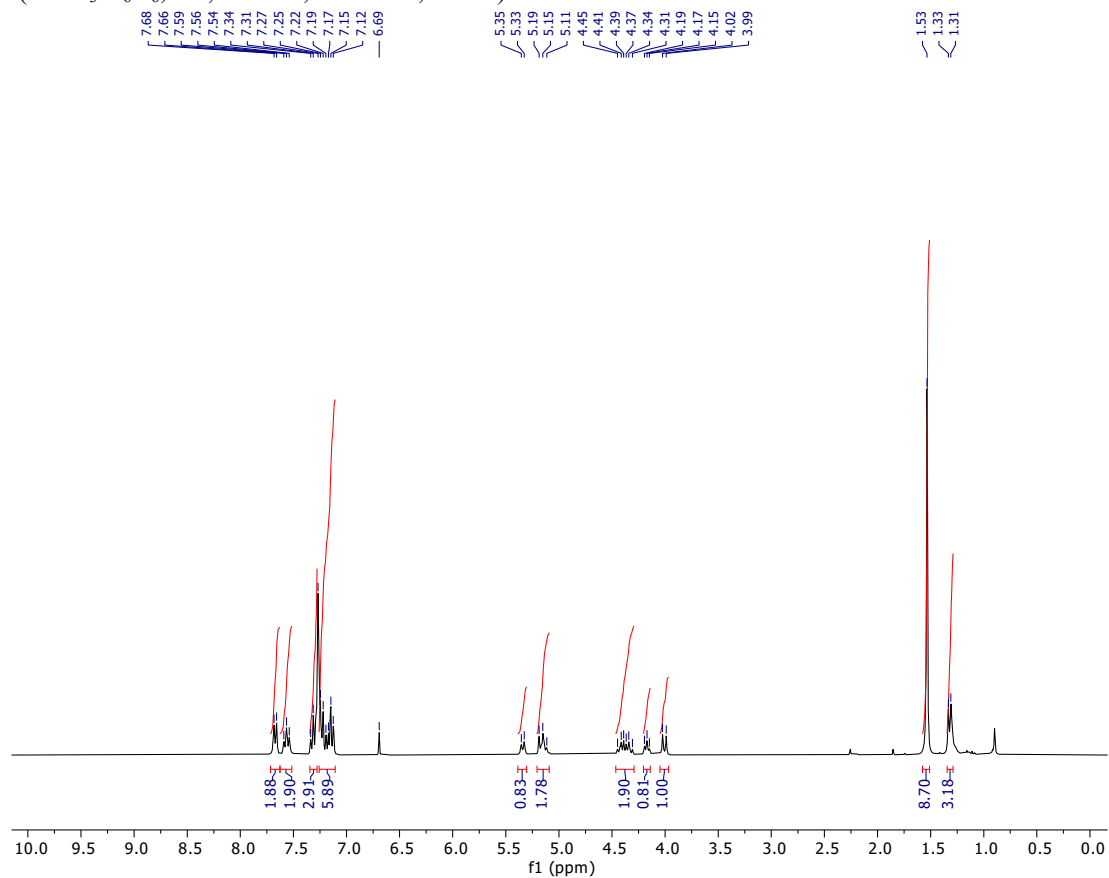

COSY-NMR ( $\text{CDCl}_3/\text{C}_6\text{D}_6$ , 1:1, 1% w/v, 400 MHz, 300 K)

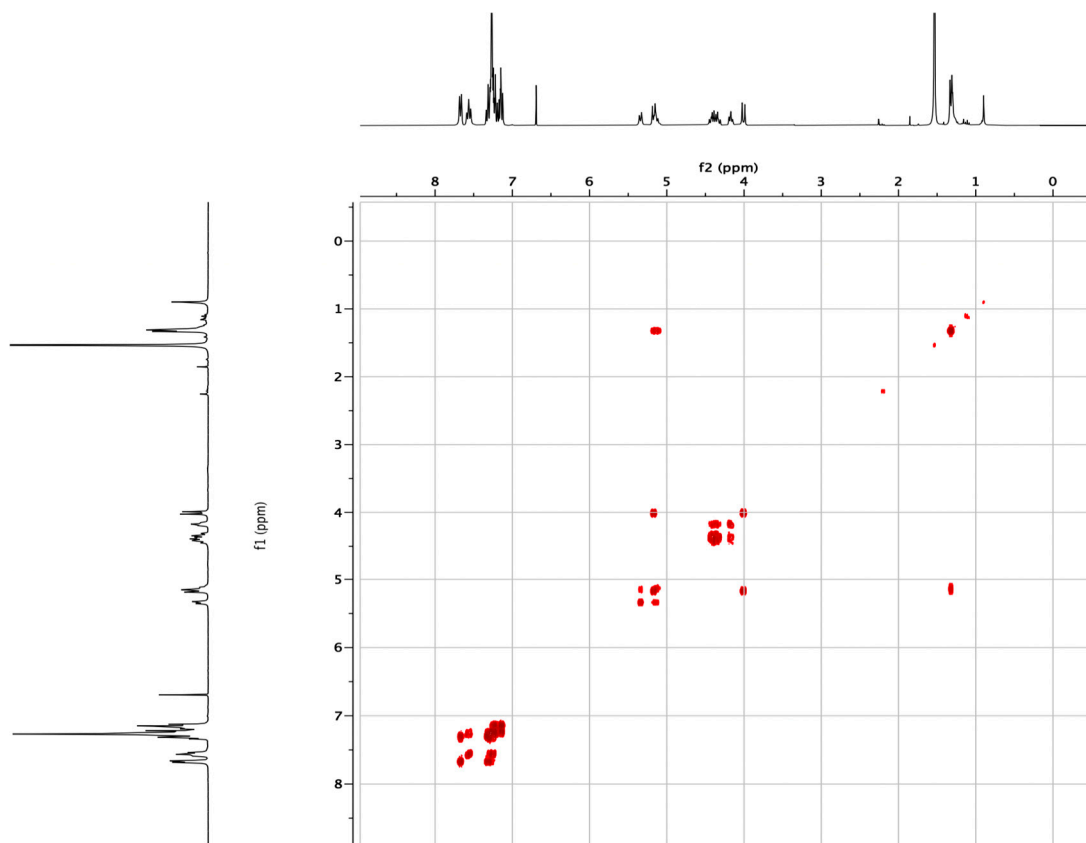

NOESY-NMR (CDCl<sub>3</sub>/C<sub>6</sub>D<sub>6</sub>, 1:1, 1% w/v, 400 MHz, 300 K,  $t_{\text{mix}} = 400$  ms)

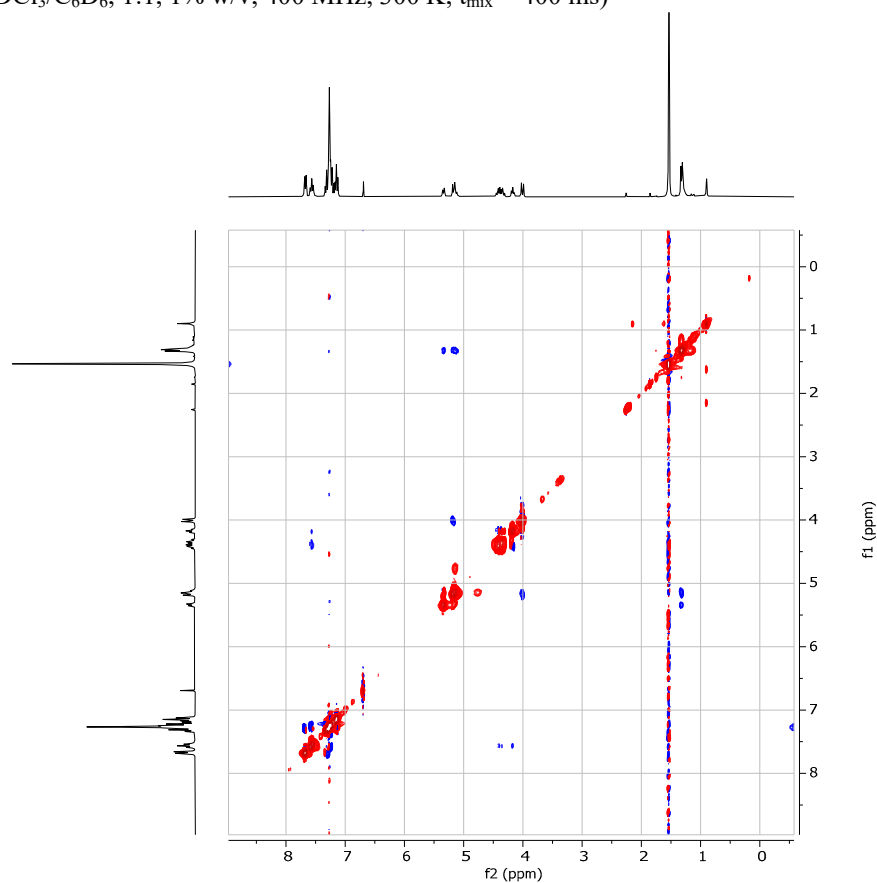

NOESY-NMR (CDCl<sub>3</sub>/C<sub>6</sub>D<sub>6</sub>, 1:1, 1% w/v, 400 MHz, 300 K,  $t_{\text{mix}} = 600$  ms)

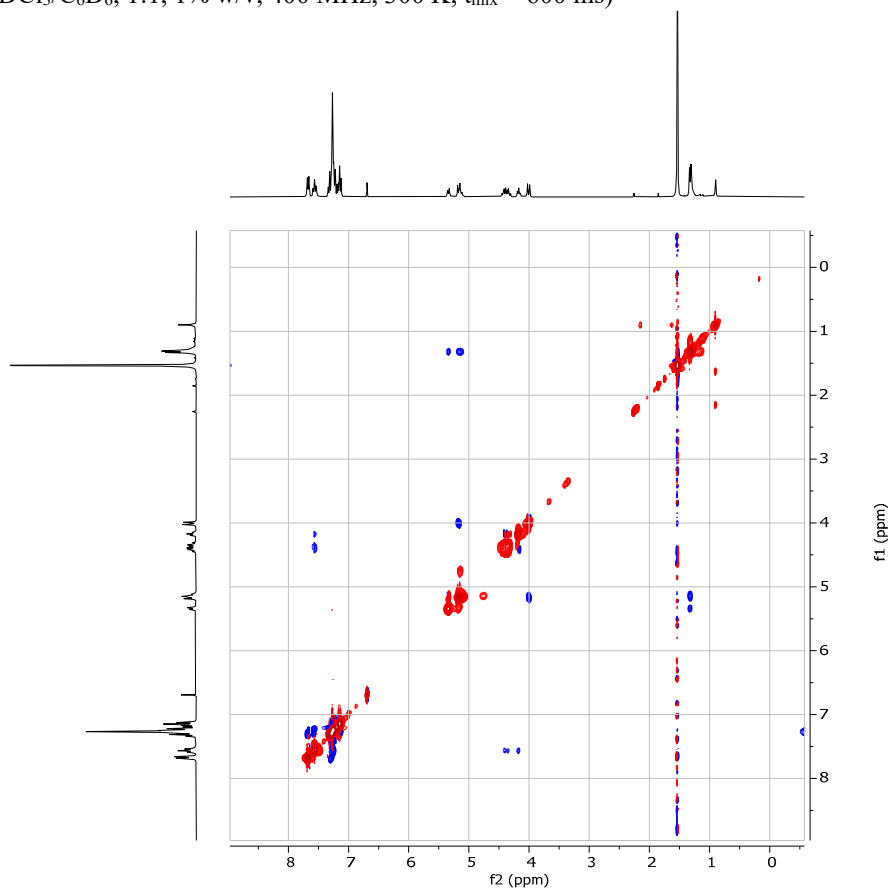

NOESY-NMR ( $\text{CDCl}_3/\text{C}_6\text{D}_6$ , 1:1, 1% w/v, 400 MHz, 300 K,  $t_{\text{mix}} = 1$  s)

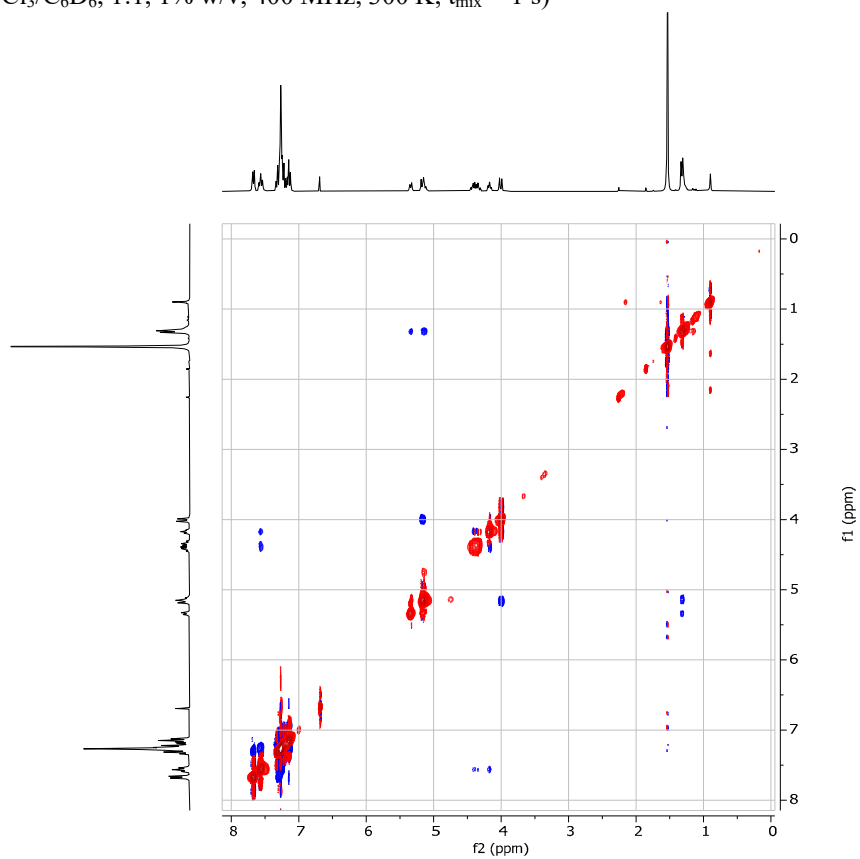

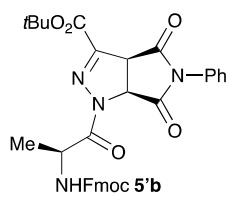

$^1\text{H}$  NMR ( $\text{CDCl}_3$ , 1% w/v, 400 MHz, 300 K)

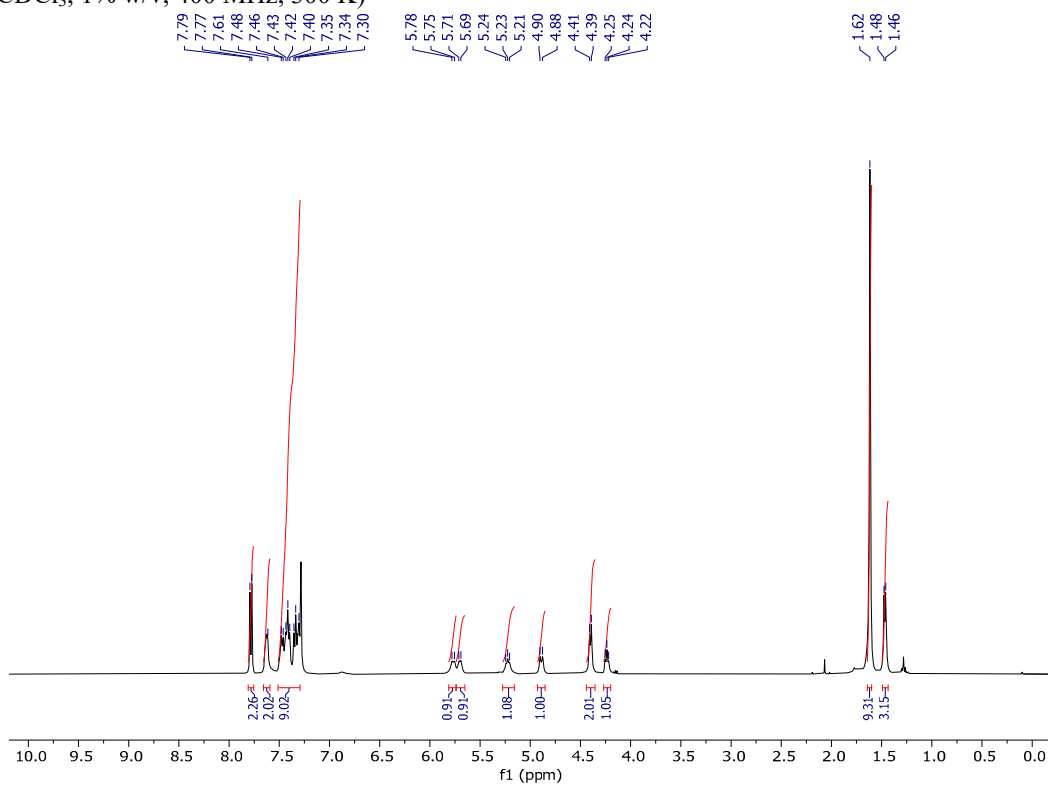

$^{13}\text{C}$  NMR ( $\text{CDCl}_3$ , 1% w/v, 100.7 MHz, 300 K)

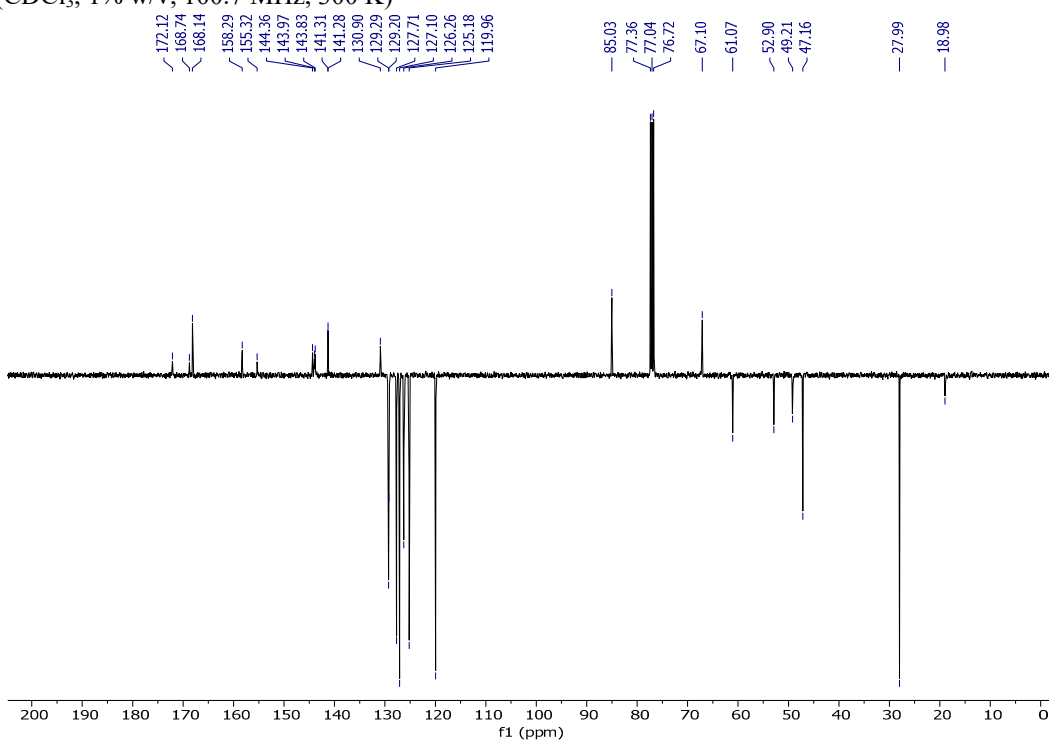

COSY-NMR (CDCl<sub>3</sub>, 1% w/v, 400 MHz, 300 K)

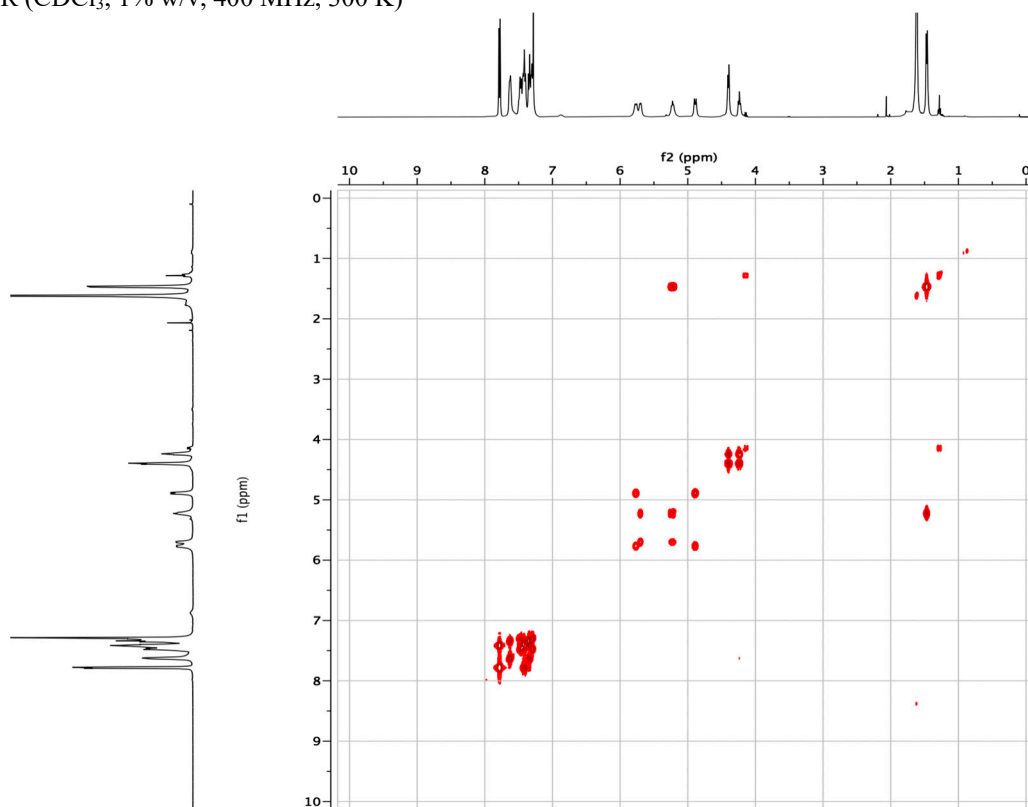

NOESY-NMR (CDCl<sub>3</sub>, 1% w/v, 400 MHz, 300 K,  $t_{\text{mix}} = 300$  ms)

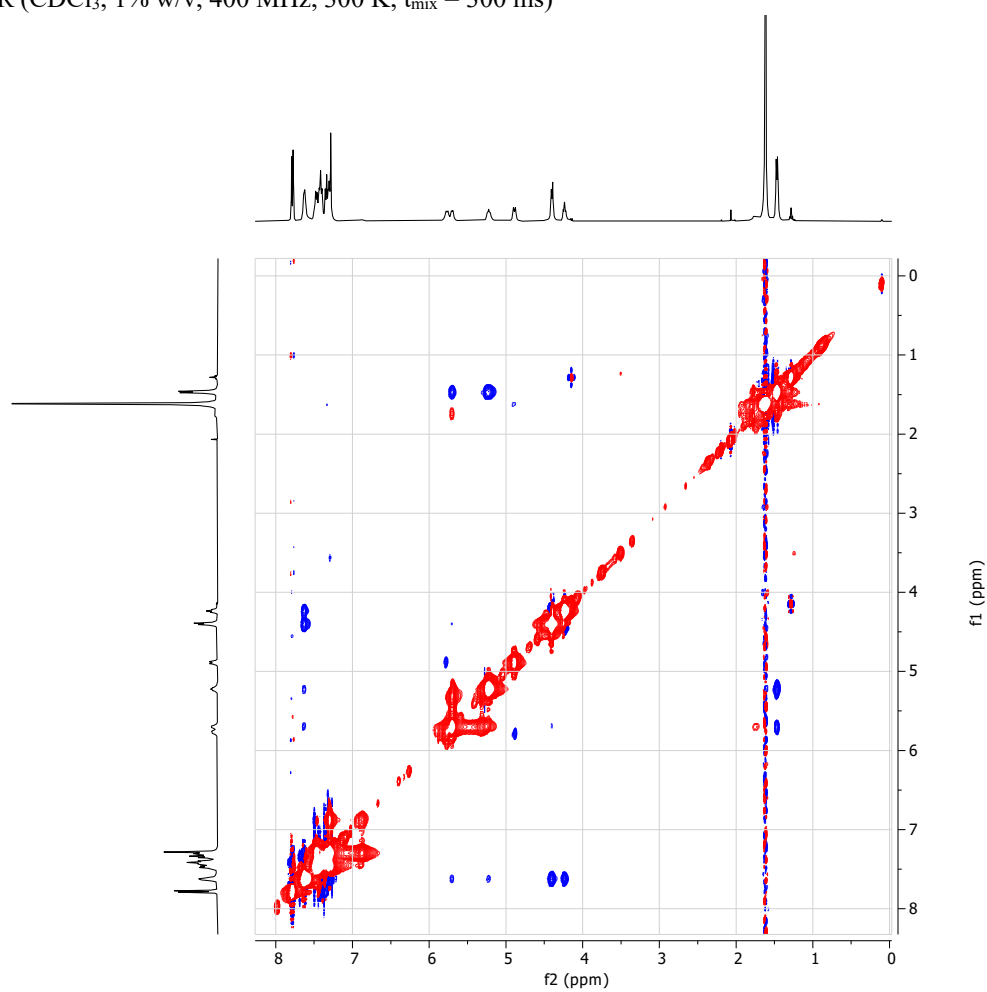

$^1\text{H}$  NMR ( $\text{C}_6\text{D}_6$ , 1% w/v, 400 MHz, 300 K)

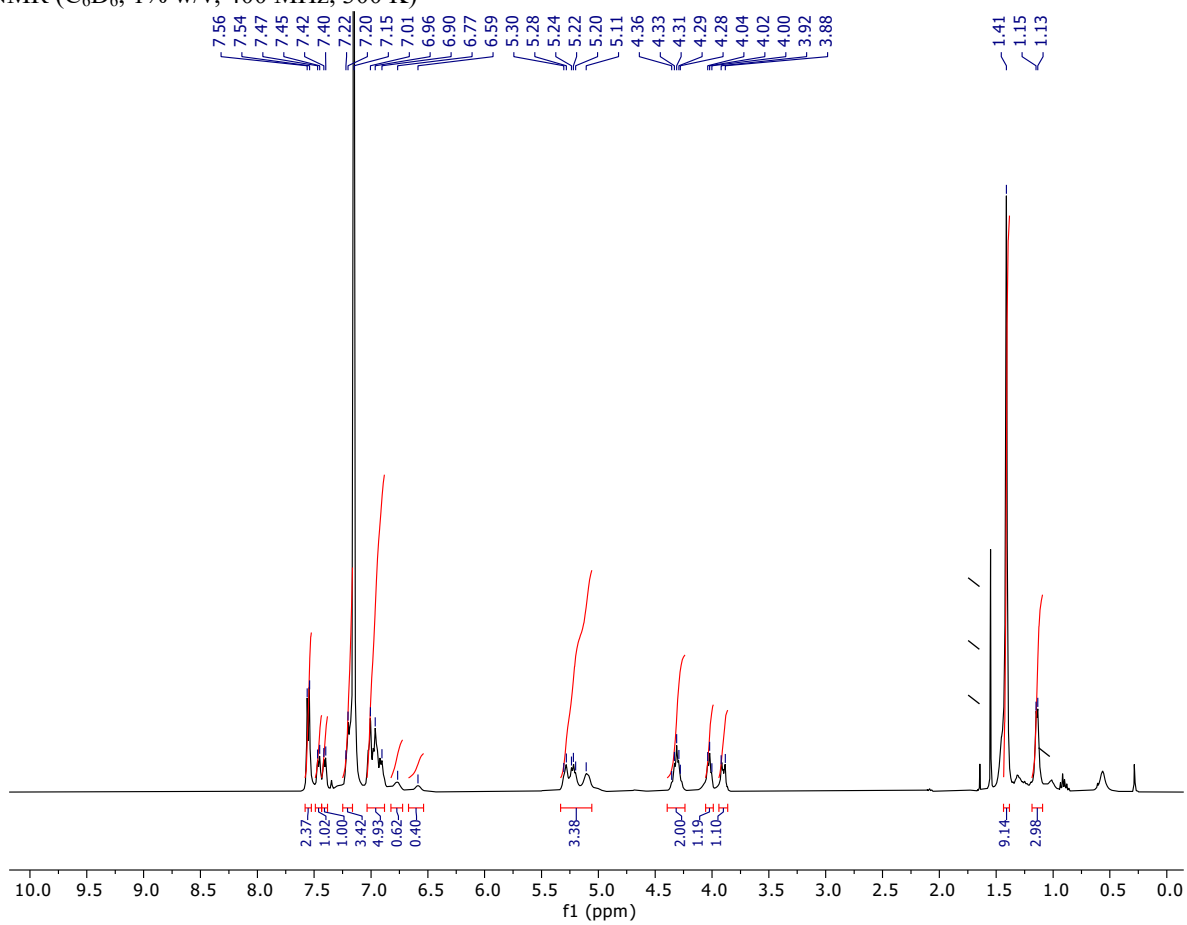

COSY-NMR ( $\text{C}_6\text{D}_6$ , 1% w/v, 400 MHz, 300 K)

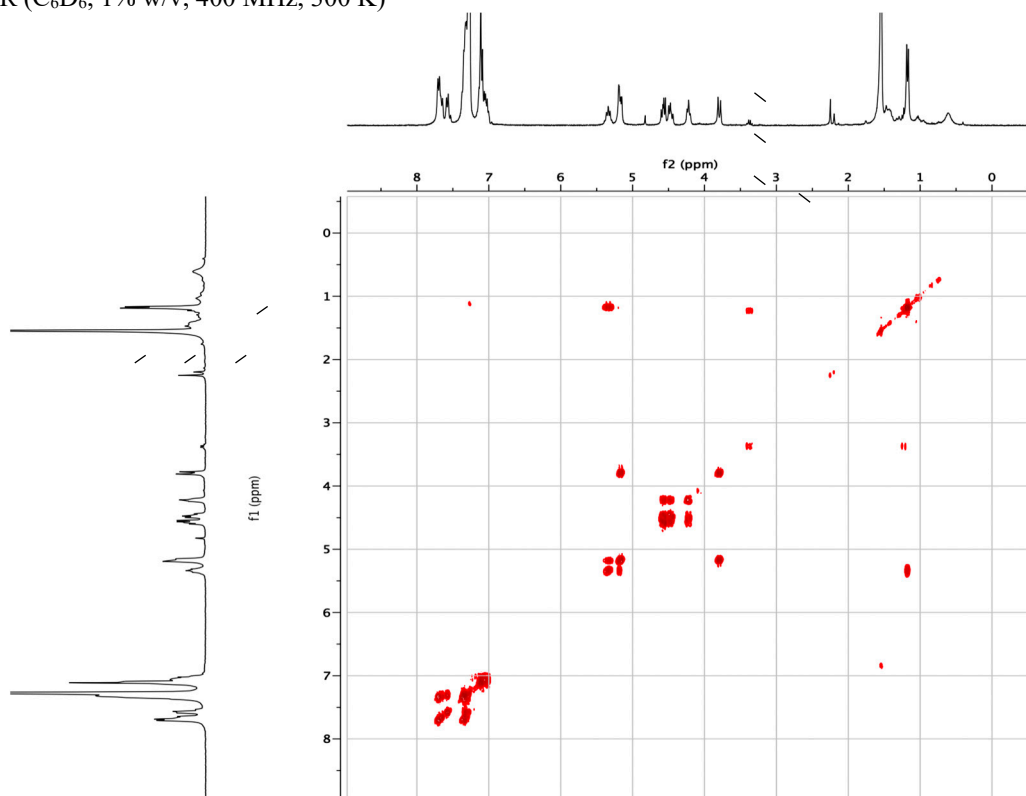

NOESY-NMR ( $\text{C}_6\text{D}_6$ , 1% w/v, 400 MHz, 300 K,  $t_{\text{mix}} = 300$  ms)

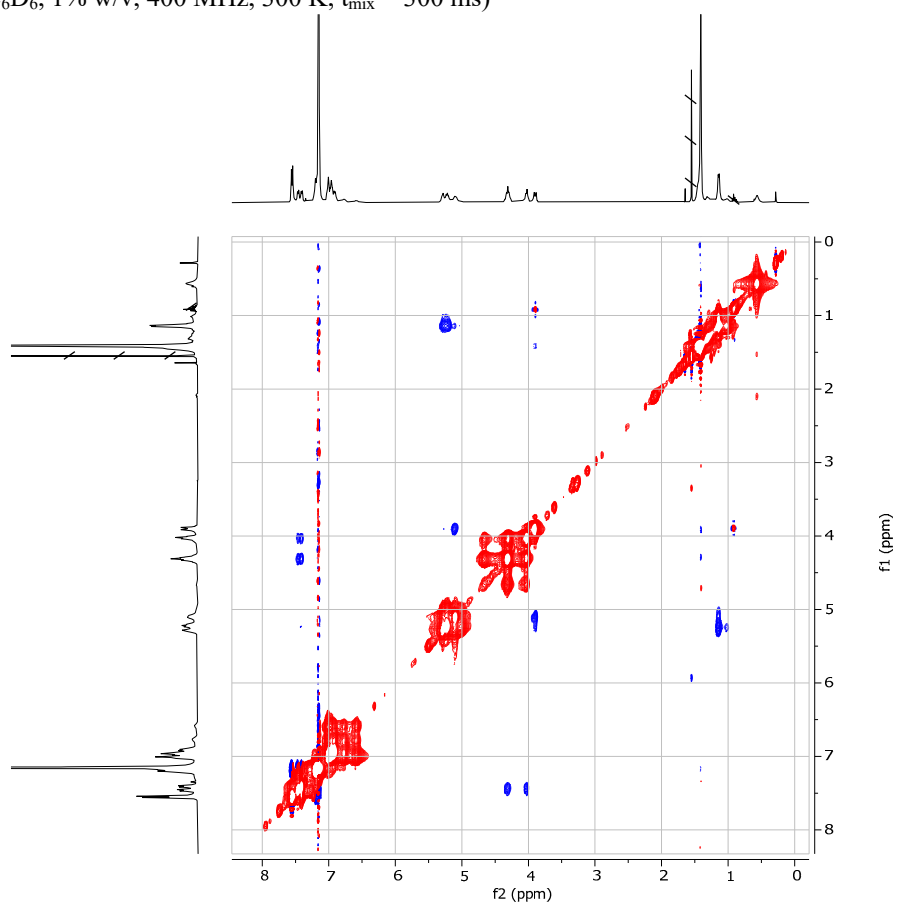

NOESY-NMR ( $\text{C}_6\text{D}_6$ , 1% w/v, 400 MHz, 300 K,  $t_{\text{mix}} = 800$  ms)

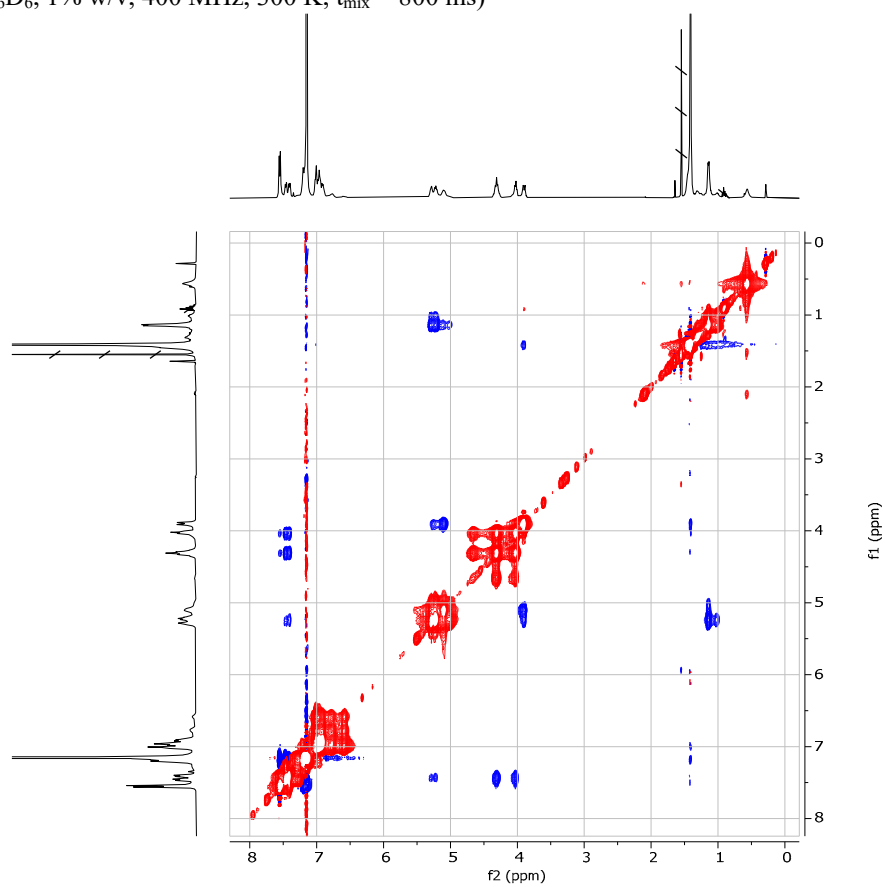

$^{13}\text{C}$  NMR ( $\text{C}_6\text{D}_6$ , 1% w/v, 100.7 MHz, 300 K)

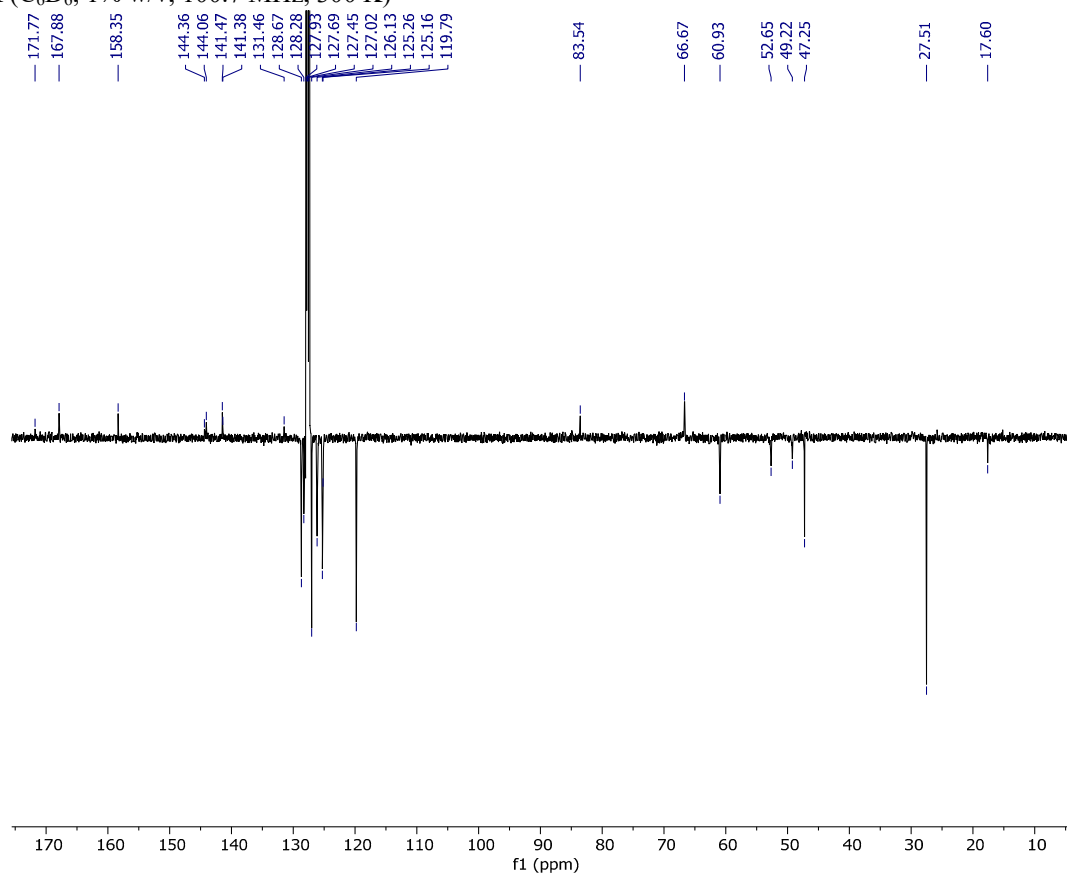

HSQC-NMR ( $\text{C}_6\text{D}_6$ , 1% w/v, 400 MHz, 100.7 MHz, 300 K)

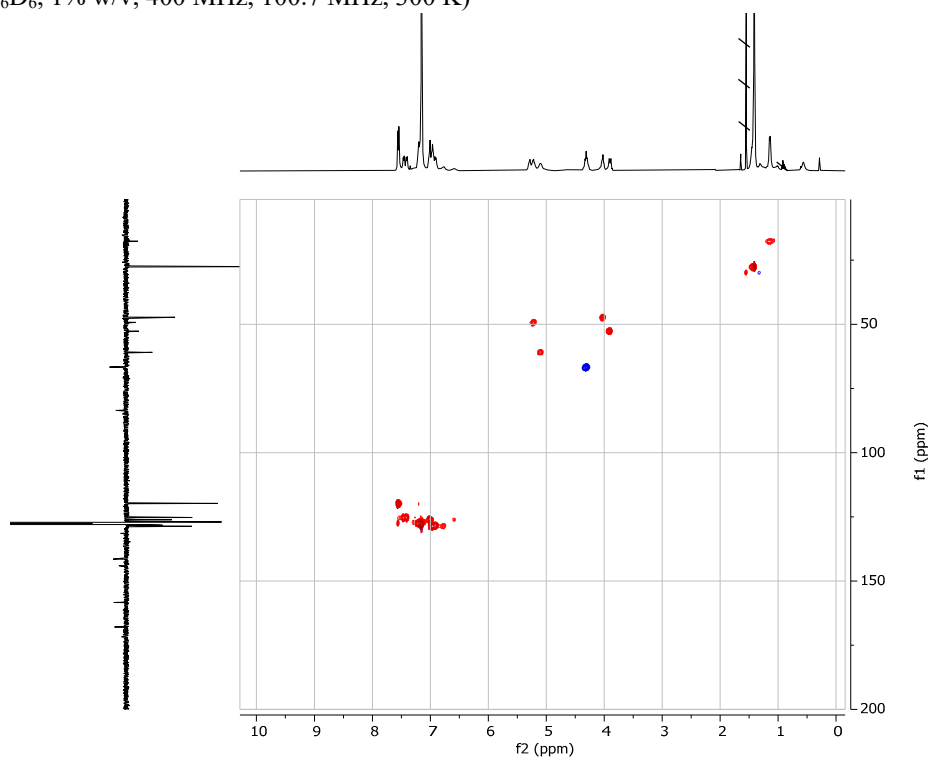

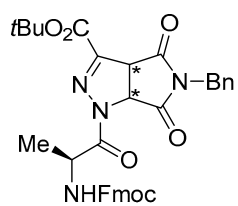

**5c**

<sup>1</sup>H NMR (CDCl<sub>3</sub>, 300 MHz, 300 K)

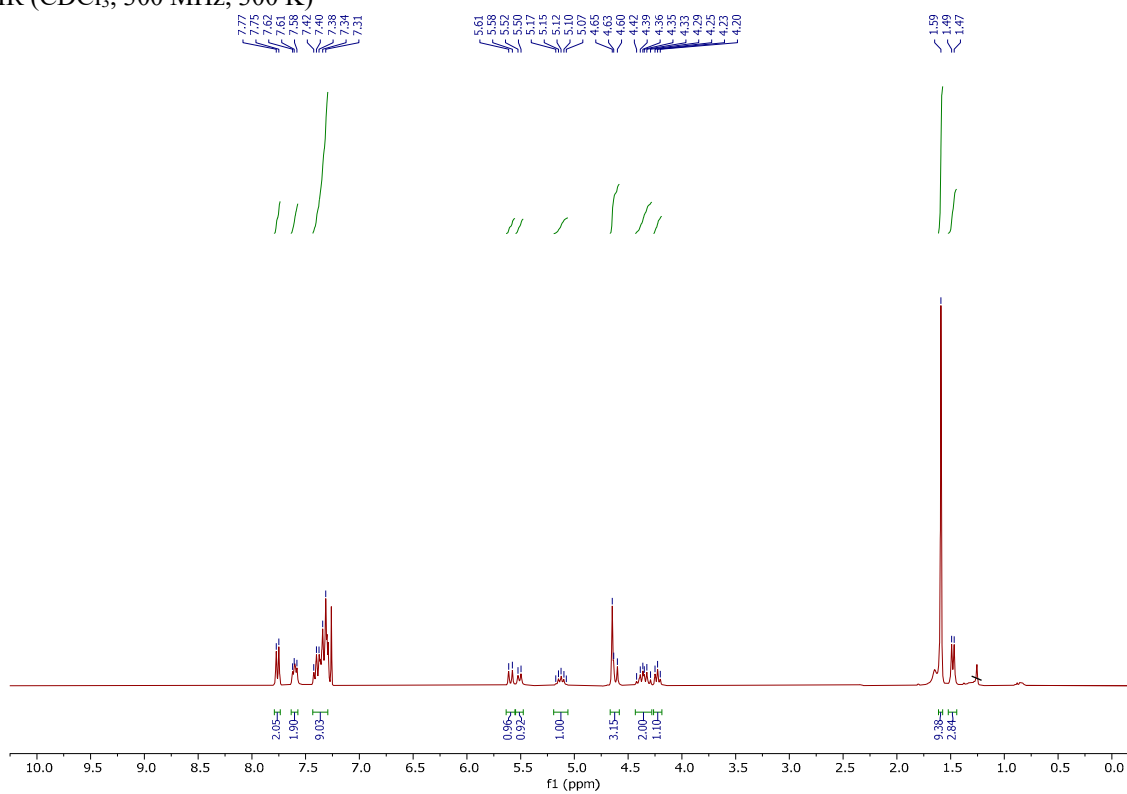

<sup>13</sup>C NMR (CDCl<sub>3</sub>, 75 MHz, 300 K)

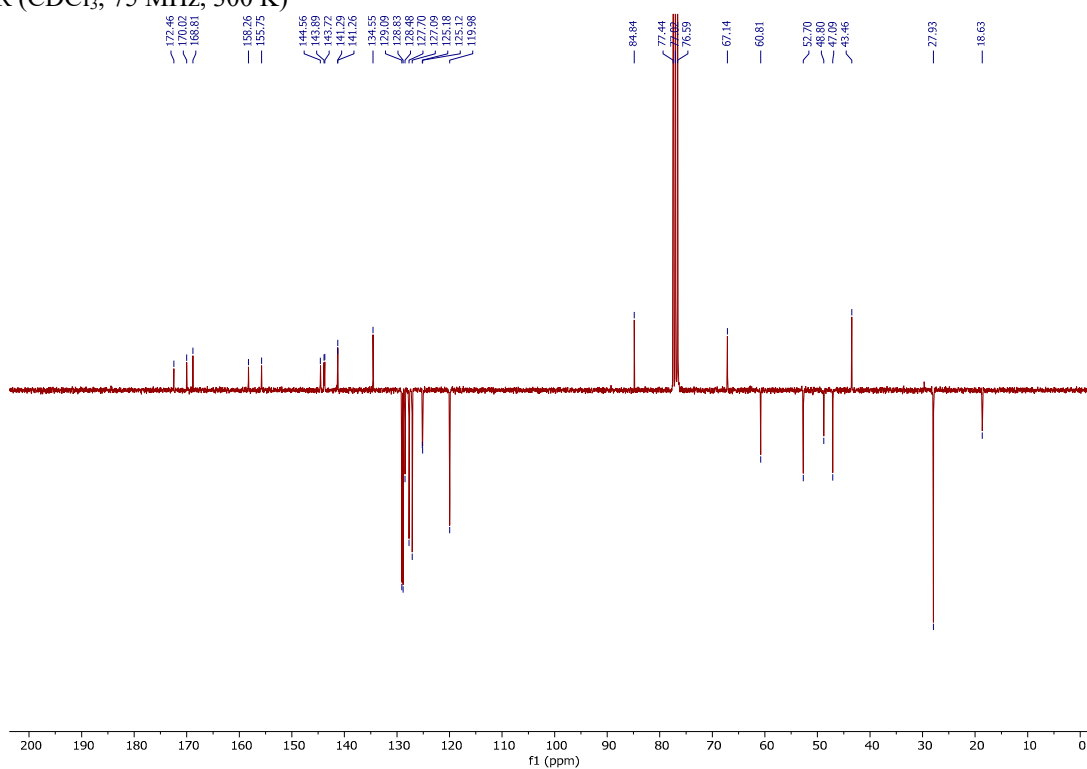

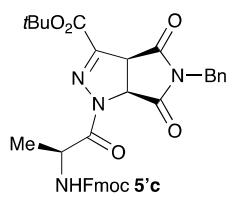

$^1\text{H-NMR}$  ( $\text{CDCl}_3$ , 400 MHz, 300 K)

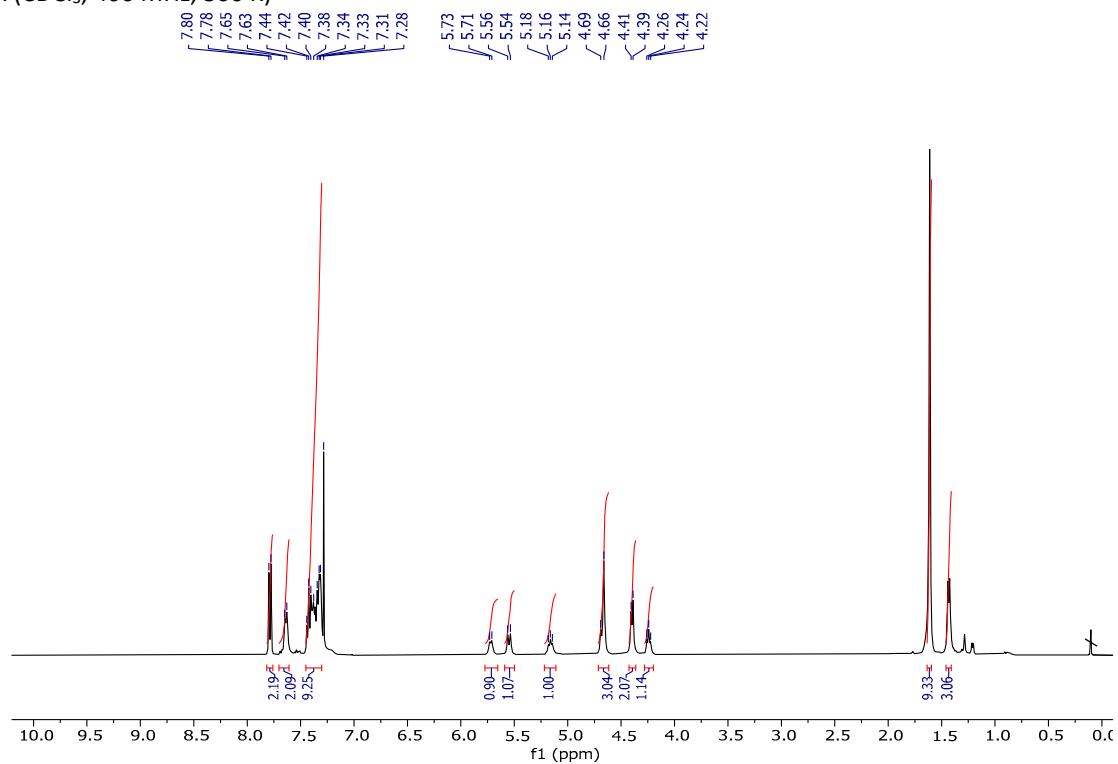

$^{13}\text{C-NMR}$  ( $\text{CDCl}_3$ , 100.7 MHz, 300 K)

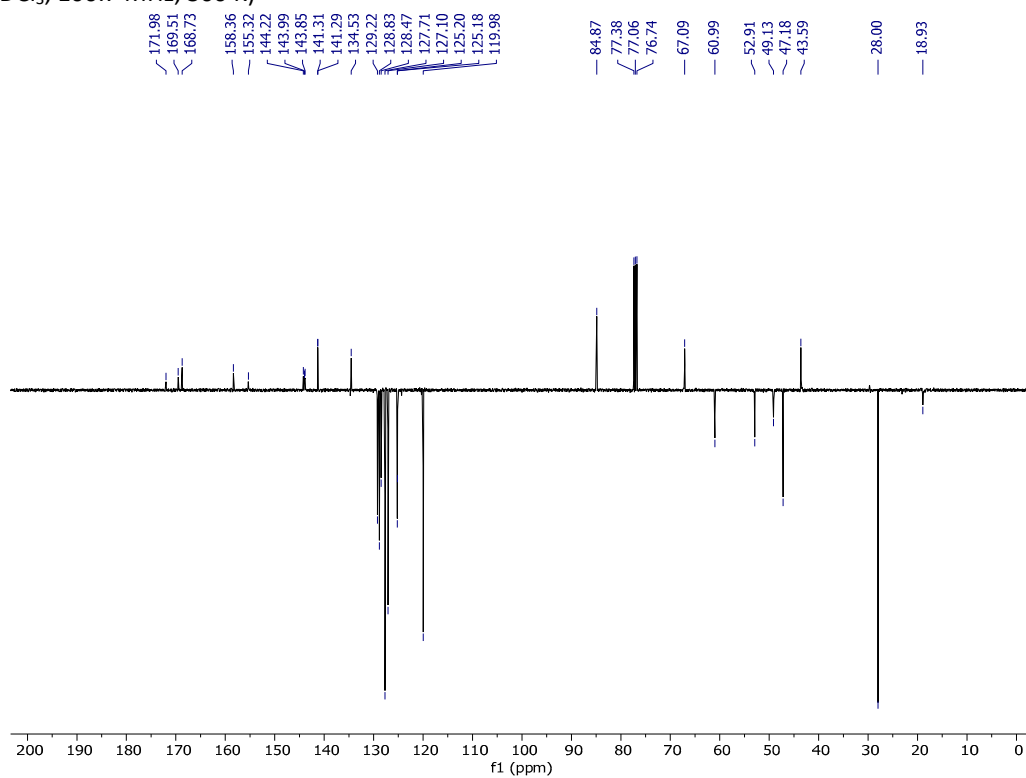

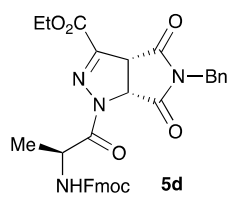

$^1\text{H}$  NMR ( $\text{CDCl}_3$ , 300 MHz, 300 K)

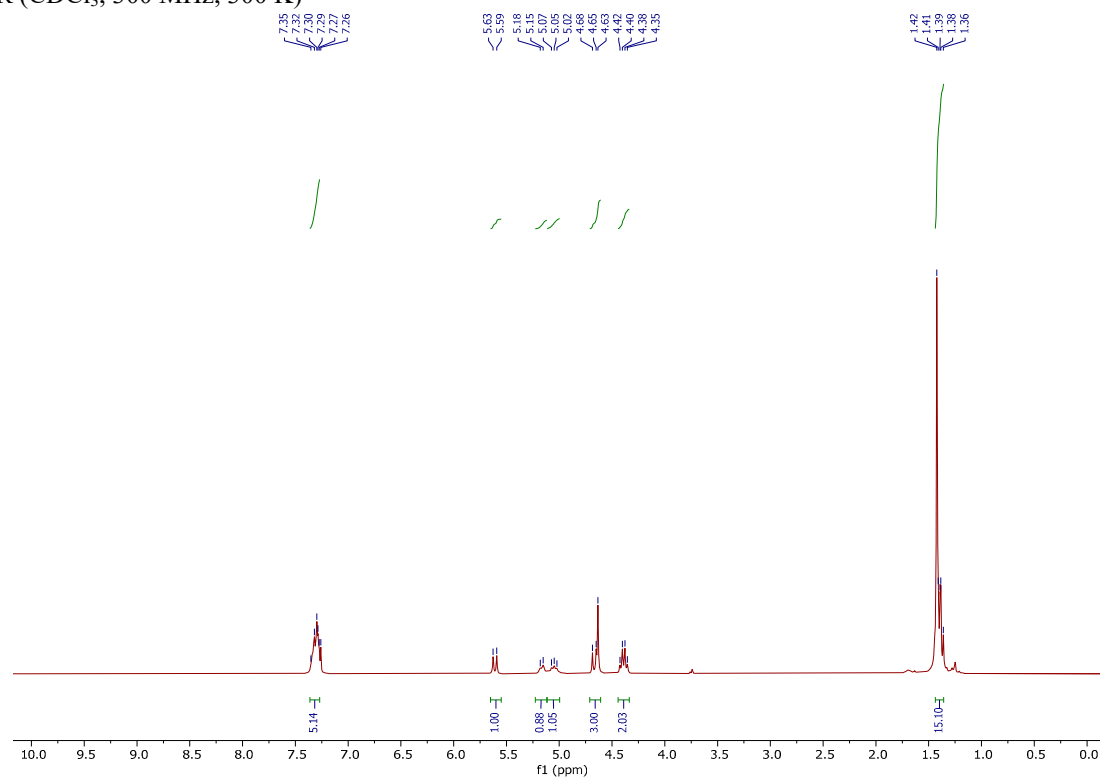

$^{13}\text{C}$  NMR ( $\text{CDCl}_3$ , 75 MHz, 300 K)

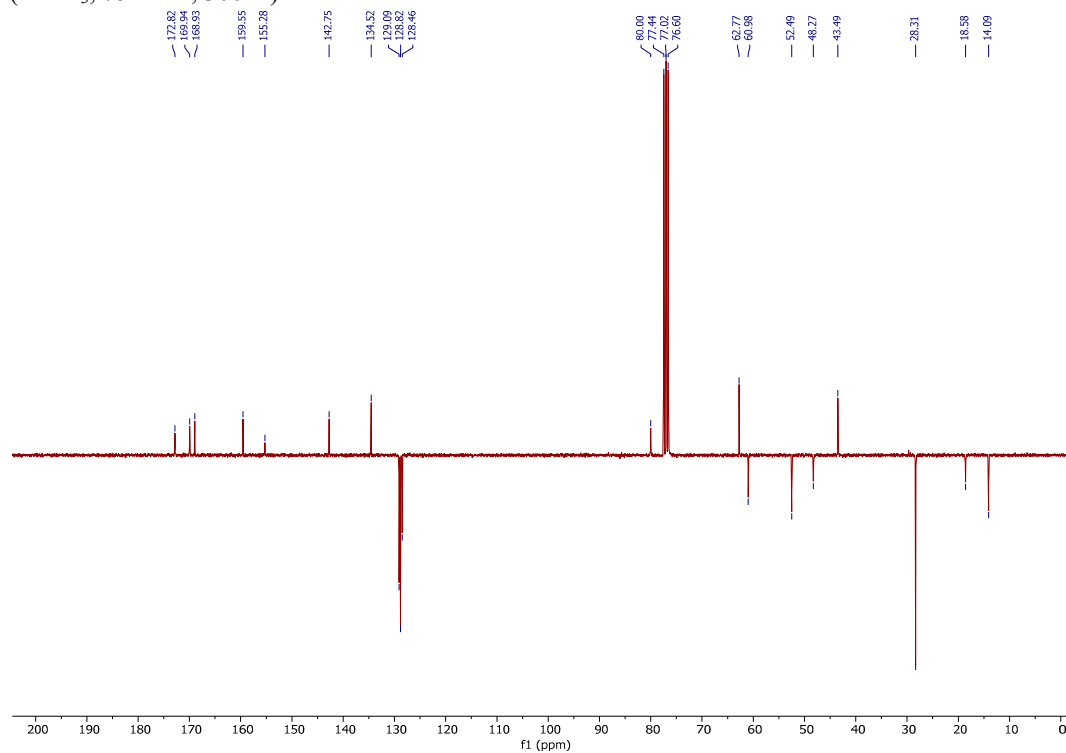

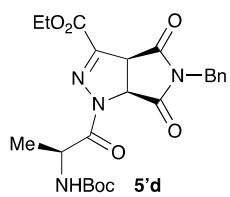

<sup>1</sup>H NMR (CDCl<sub>3</sub>, 400 MHz, 300 K)

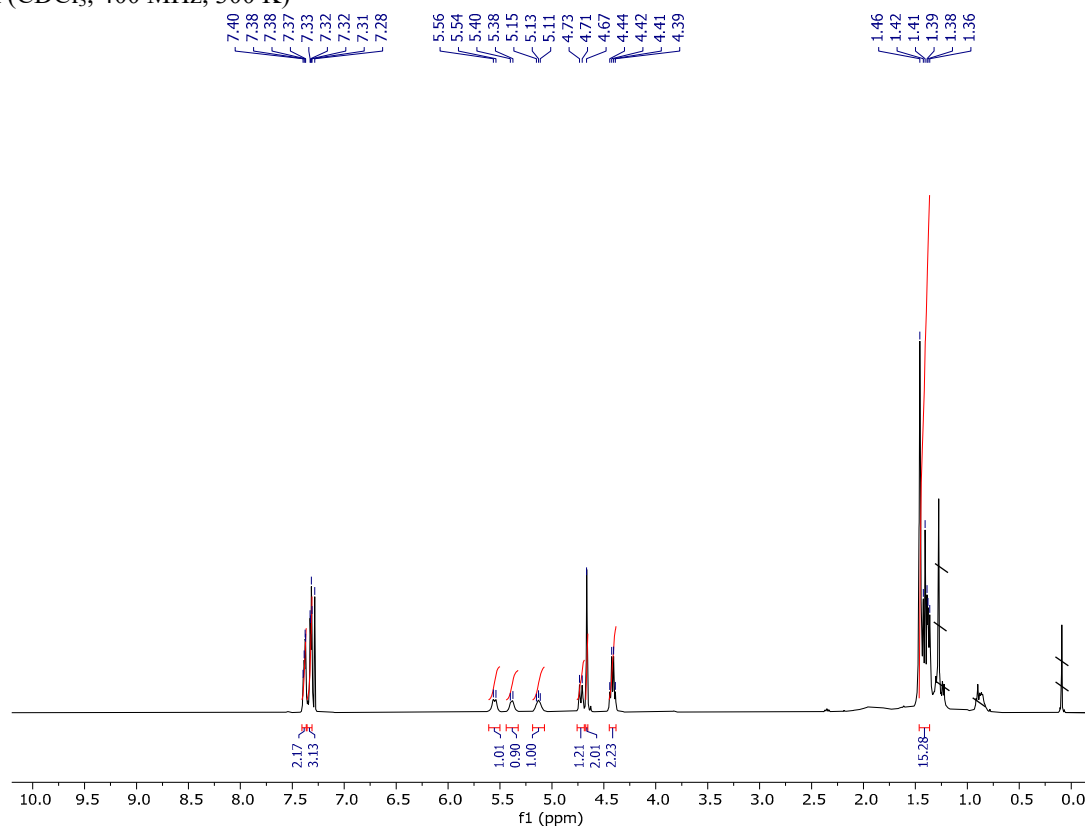

<sup>13</sup>C NMR (CDCl<sub>3</sub>, 100.7 MHz, 300 K)

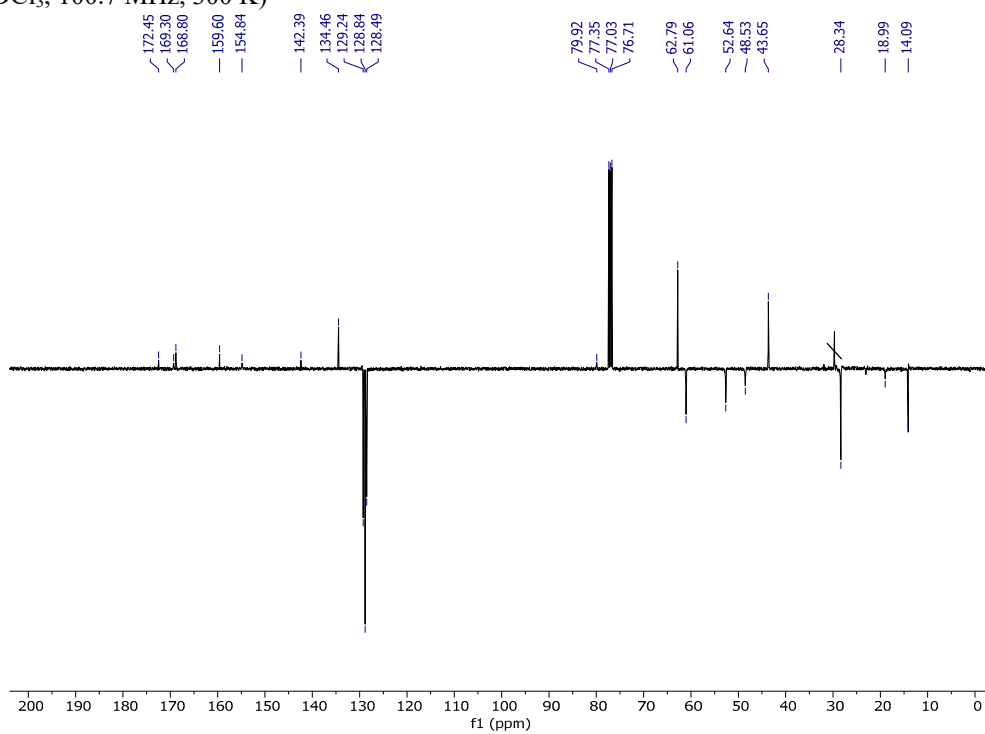

Supplement: s1 [file s1]
